1 Th2 single-cell heterogeneity and clonal interorgan distribution in  
2 helminth-infected mice

3

4 Daniel Radtke<sup>1\*</sup>, Natalie Thuma<sup>1</sup>, Philipp Kirchner<sup>2</sup>, Arif B Ekici<sup>2</sup>, David Voehringer<sup>1\*</sup>

5 <sup>1</sup>Department of Infection Biology, Universitätsklinikum Erlangen and Friedrich-Alexander  
6 University Erlangen-Nürnberg (FAU), 91054 Erlangen, Germany

7 <sup>2</sup>Institute of Human Genetics, Universitätsklinikum Erlangen and Friedrich-Alexander University  
8 Erlangen-Nürnberg (FAU), 91054 Erlangen, Germany

9 \*corresponding authors

10 **Email:** Daniel.Radtke@uk-erlangen.de, david.voehringer@uk-erlangen.de

11 **Author Contributions:** Conceptualization: DR, NT, DV; Funding Acquisition: DV; Investigation:  
12 DR, NT, PK, ABE; Supervision: DV; Manuscript Preparation: DR, NT, DV

13

14

## 15 Abstract

16 Th2 cells provide effector functions in type 2 immune responses to helminths and allergens.  
17 Despite knowledge about molecular mechanisms of Th2 cell differentiation, there is little  
18 information on Th2 cell heterogeneity and clonal distribution between organs. To address this, we  
19 performed combined single-cell transcriptome and TCR clonotype analysis on murine Th2 cells in  
20 mesenteric lymph nodes (MLN) and lung after infection with *Nippostrongylus brasiliensis* (Nb) as  
21 a human hookworm infection model. We find organ-specific expression profiles, but also  
22 populations with conserved migration or effector/resident memory signatures that unexpectedly  
23 cluster with potentially regulatory *Il10<sup>pos</sup>Foxp3<sup>neg</sup>* cells. A substantial MLN subpopulation with an  
24 interferon response signature suggests a role for interferon-signaling in Th2 differentiation or  
25 diversification. Further RNA-inferred developmental directions indicate proliferation as a hub for  
26 differentiation decisions. We also link long noted *Cxcr3* expression in the Th2 compartment to a  
27 population of *Il4<sup>pos</sup>* NKT cells. Although the TCR repertoire is highly heterogeneous, we identified  
28 expanded clones and CDR3 motifs. Clonal relatedness between distant organs confirmed  
29 effective exchange of Th2 effector cells, although locally expanded clones dominated the  
30 response. These results provide new insights in Th2 cell subset diversity and clonal relatedness  
31 in distant organs.

32

## 33 Introduction

34

35 Th2 cells are part of the adaptive immune response against helminths and in allergic diseases.  
36 They are recruited and differentiate from a pool of naïve CD4 T cells with a wide variety of T cell  
37 receptors (TCR) that are formed during T cell development and provide clonotypic specificity to  
38 antigens. Differentiated Th2 cells produce the key type 2 cytokines IL-4, IL-5, and IL-13 that elevate  
39 type 2 immune responses and thereby promote allergic inflammation but also mediate protection  
40 against helminths (Walker & McKenzie, 2018). In recent years, several IL-4 producing Th2  
41 subpopulations have been described and point to substantial heterogeneity within the Th2  
42 population. Only a minor fraction of human IL-4<sup>+</sup> T cells produces IL-5 which defines them as highly  
43 differentiated cells (Upadhyaya, Yin, Hill, Douek, & Prussin, 2011). In the mouse, Th2 cells in the  
44 lung generally appear more activated and co-express IL-4 and IL-13 as compared to Th2 cells  
45 isolated from lymph nodes of helminth-infected mice (Liang et al., 2011). Th2 cells can further  
46 differentiate to follicular T helper 2 (Tfh2) cells that express IL-4, IL-21 and BCL6 and drive humoral  
47 type 2 immune responses in the germinal center (GC) (Glatman Zaretsky et al., 2009; King &  
48 Mohrs, 2009; Reinhardt, Liang, & Locksley, 2009) although IL-4 secretion by T cells located outside  
49 of GCs can be sufficient for GC formation and class switch recombination to IgE (Turqueti-Neves  
50 et al., 2014). Tfh13 cells may also develop from Th2 cells in settings of allergic inflammation. These  
51 cells co-express IL-4, IL-5 and IL-13 and promote the generation of high affinity anaphylactic IgE  
52 in response to allergens (Gowthaman et al., 2019). In addition to these subsets with distinct  
53 functions, there are likely different activation and developmental stages present in the Th2  
54 population. Furthermore, fate mapping and adoptive transfer experiments revealed functional  
55 plasticity between T helper cell subpopulations which can lead to Th2 cells with remaining or  
56 upcoming signatures of other CD4 T cell subsets like Th1, Th9 or Th17 cells (Panzer et al., 2012;  
57 Peine et al., 2013; Tortola et al., 2020; Veldhoen et al., 2008).

58 Infection of mice with the helminth *Nippostrongylus brasiliensis* (Nb) is a widely used model for  
59 human hookworm infections with a strong induction of Th2 responses in lung and small intestine  
60 (Urban et al., 1992). L3 stage larvae are injected subcutaneously and then first migrate into the

61 lung before they are coughed up, swallowed and reposition to the small intestine where they mature  
62 to adult worms. (Urban et al., 1992). Using this model, we have previously shown that Nb infection  
63 induces a Th2 response with a broad T cell receptor (TCR) repertoire required for effective worm  
64 expulsion (Seidl, Panzer, & Voehringer, 2011). Development of single cell sequencing technology  
65 now allowed us to gain a deeper understanding of Th2 cell subsets, TCR clonality and tissue  
66 distribution.

67 Here, we performed single-cell sequencing of T cell receptor (TCR) genes combined with  
68 transcriptome profiling of Th2 cells isolated from lung and mesenteric lymph nodes (MLN) at day  
69 ten after Nb infection. By this approach, we revealed heterogeneity and differentiation paths within  
70 the Th2 compartment, compared Th2 population similarity at distant sites, analyzed cell exchange  
71 between organs by clonal relatedness and characterized expanded clones and their TCR  
72 sequences.

73

74

## 75 **Results**

76

### 77 **Th2 cells show an organ-specific gene expression profile consistent with acquired effector** 78 **functions**

79 We performed combined transcriptome and TCR clonotype analysis using the chromium  
80 10xGenomics and Illumina single cell sequencing platform on IL-4-expressing Th2 cells isolated  
81 from lung and MLN of two IL-4eGFP reporter (4get) mice (M. Mohrs, Shinkai, Mohrs, & Locksley,  
82 2001) that had been infected 10 days before with Nb (Fig. 1A). IL-4-expressing Th2 cells (CD4<sup>+</sup>IL-  
83 4eGFP<sup>+</sup>) were sorted from single cell suspensions of both organs and were directly subjected to  
84 scRNA library preparation.

85 4get mice were chosen as they allow isolation of Th2 cells *ex vivo* without prior restimulation. In  
86 contrast to other IL-4 reporter mice such as the KN2 strain, 4get mice even report the early stages  
87 of Th2 differentiation (K. Mohrs, Wakil, Killeen, Locksley, & Mohrs, 2005). Sampling of the lung was  
88 performed as Th2 cells accumulate in this organ a few days after Nb infection. Complimentary  
89 MLNs were included as a distant secondary lymphoid organ associated to the intestine where the  
90 worms reside from day 4 to about day 10 after infection. This setup enabled us to compare Th2 cell  
91 subsets and clonotypes in both organs at single cell resolution.

92 In order to restrict the analysis after sequencing to high quality Th2 cells, we included in total  
93 4710 cells with detected, functional TCR  $\alpha$ - and  $\beta$ -chains that also passed our additional QC filters  
94 (see methods section) (Suppl. Fig. 1). We used an unbiased high dimensional clustering approach  
95 followed by dimensional reduction for simple representation of complex data (Stuart et al., 2019).

96 Our approach revealed that Th2 cells of lung and MLN have a distinct organ-specific expression  
97 profile represented by clear separation of cells from both organs upon dimensional reduction (Fig.  
98 1B) and highlighted by differential expression analysis between lung and MLN cells (Fig. 1C). While  
99 most Th2 cells from the MLN (MLN cells) express the gene for the chemokine receptor CXCR5  
100 associated with homing to B cell follicles and recruitment of Tfh cells to germinal centers (Breitfeld  
101 et al., 2000; Schaeferli et al., 2000), the majority of Th2 cells from the lung (lung cells) and MLN cells  
102 that cluster in proximity to lung cells hardly express it (Fig. 1D). Interestingly these cells rather show  
103 an increased expression of the gene for TAGLN2 which stabilizes the immunological synapse and  
104 is relevant for proper T cell effector function (Na et al., 2015). A stronger effector phenotype of lung  
105 cells is also supported by an increase of inflammation signature genes and hypoxia-associated

106 genes in these cells, which are associated with enhanced glycolysis required for late Th2 effector  
107 differentiation (Healey et al., 2021; Stark, Tibbitt, & Coquet, 2019) (Fig. 1E).

108 In line with enhanced effector function, most lung cells and some proximal MLN cells express the  
109 gene for the IL-33 receptor ST2 (*Il1rl1*) that recognizes the alarmin IL-33 and induces IL-5 and IL-  
110 13 production. Mice that lack IL-33 are not able to effectively clear intestinal helminths, likely due  
111 to defects in the T cell and ILC2 compartments (Hung et al., 2013). We also find an elevated gene  
112 signature for IL-33-stimulated T cells in the lung, which suggests active signaling via the ST2  
113 receptor. Amongst several stimuli, ST2 can be up-regulated via the IL-2-STAT5 axis (Guo et al.,  
114 2009; Meisel et al., 2001) for which we find an elevated expression of the IL-2 receptor (*Il2ra*) and  
115 target genes in the lung. In addition, we find an elevated TNF expression signature together with  
116 higher expression of the gene *Tnfrsf1b* encoding for Tumor necrosis factor receptor 2 (TNF-R2)  
117 that promotes ST2 expression upon TNF binding (Kumar, Tzimas, Griswold, & Young, 1997). IL-  
118 33/ST2 mediated signals in turn induce production of amphiregulin in asthma models and we also  
119 find the amphiregulin encoding gene *Areg* to be up-regulated in lung cells upon Nb infection.  
120 Amphiregulin promotes tissue repair and resolution of inflammation in tissues (Zaiss, Gause,  
121 Osborne, & Artis, 2015) but can also re-program eosinophils to develop a fibrosis-driving effector  
122 phenotype (Morimoto et al., 2018).

123 In our Nb infection model, lung cells and a fraction of proximal clustering MLN cells also express  
124 genes associated with asthma or involved in pathways targeted by drugs for asthma treatment like  
125 *Cysltr1*, *Plac8* or *Adam8* (Naus et al., 2010; Tibbitt et al., 2019; Trinh, Nguyen, Choi, Park, & Shin,  
126 2019). Lung cells but only few MLN cells in our dataset also show an increased expression of TGFβ  
127 target genes, consistent with the described Th2 cell plasticity towards a Th9 phenotype (Veldhoen  
128 et al., 2008) which potentially broadens the T effector functions (Fig. 1C-E).

129

### 130 **Conserved expression profiles for migratory and effector/resident memory Th2 cell** 131 **populations in lung and mesenteric lymph nodes**

132 Next, we combined an analysis of gene expression with unbiased cluster and RNA velocity  
133 analysis to define subpopulations and identify potential developmental and differentiation paths.  
134 We define two lung, five MLN and a mixed proliferative cluster numbered by size and further  
135 described below (Fig. 2A): L1 (basic activated/effector), L2 (migrating), L+MLN (proliferating),  
136 MLN1 (basic activated), MLN2 (contains Tfh2), MLN3 (IFN response signature), MLN4  
137 (effector/resident memory like), MLN5 (migrating), MLN6 (innate-like/NKT), MLN7 (myeloid RNA  
138 containing Th2).

139 We first screened the cells for known markers of T helper cell subsets. The analyzed cells from  
140 MLN and lung express the Th2 hallmark genes *Il4*, *Gata3* and *Stat6* (Fig. 2B). However, only the  
141 L1 cluster expresses IL-5 which promotes eosinophil development, recruitment and survival.  
142 Similarly, IL-13 is expressed a bit broader in L1 but additionally in MLN4. IL-13 elicits a broad  
143 spectrum of effector type 2 immune functions including eosinophilic inflammation, mucus secretion  
144 and airway hyperresponsiveness (Rothenberg & Hogan, 2006; Takatsu, Kouro, & Nagai, 2009).  
145 According to the pro-inflammatory IL-5 and IL-13 production, double producers are thought to be a  
146 strong or pathogenic effector subset of Th2 cells that includes highly differentiated CD27<sup>low</sup>, PD-  
147 1(*Pdcd1*)<sup>high</sup> memory cells (Upadhyaya et al., 2011), which is also reflected on gene expression  
148 level in our data. Enhanced *Rgs16* expression of the IL-5<sup>+</sup>/IL-13<sup>+</sup> cells is also associated with higher  
149 cytokine production (Lippert et al., 2003) and further supports effective effector molecule production  
150 (Fig. 2B).

151 As expected very few Th2 cells in L1 express the Th1 hallmark genes *Ifng* and *Tbx21* (encodes  
152 T-bet). However, MLN6 expresses the genes for the usually Th1-associated chemokine receptor



153 CXCR3 plus the MLN activation- and lamina propria homing-associated chemokine receptor CCR9  
154 (Campbell & Butcher, 2002; Stenstad et al., 2006). In this population, a fraction of cells also  
155 expresses *Zbtb16* which encodes the NKT cell-associated transcription factor PLZF (Savage et al.,  
156 2008) and *Klrb1c* (encodes NK1.1) or in addition to the TCR $\alpha$  and TCR $\beta$  chains *Tcr $\gamma$ -1c* (encodes  
157 the constant region of TCR $\gamma$ ) as an indication that these cells show signs of unsuccessful or not yet  
158 successful development into  $\gamma\delta$  T cells. Hence, MLN6 seems to contain predominantly innate-like /  
159 NKT cells (Fig. 2B).

160 The classical marker for Treg cells FOXP3 was hardly found on gene expression level in our  
161 dataset. Nevertheless, small fractions of cells in L1 and MLN4 express *Il10*, which suggests  
162 regulatory capacity independent of *Foxp3* expression (Fig. 2B).

163 T follicular helper cells that express IL-4 (Tfh2) were detected in MLN2 They express both Tfh  
164 markers IL-21 and BCL6 on gene level. Of note, *Bcl6* expression seems less restricted to a specific  
165 cluster. Where *Il21* and *Bcl6* expression overlaps cells show expression of *Rgs16* associated with  
166 enhanced Th2 cytokine production and trafficking (Lippert et al., 2003). In line with a recent  
167 publication, we did not observe Tfh13 cells (IL-13<sup>hi</sup>IL-4<sup>hi</sup>IL-5<sup>hi</sup>IL-21<sup>lo</sup>) which were reported to be  
168 associated with production of high-affinity anaphylactic IgE in Th2 responses to allergens but not  
169 helminth infections (Gowthaman et al., 2019).

170 Increased expression of TGF $\beta$  target genes further suggested Th2 cell plasticity towards Th9  
171 cells in our data set (Fig. 1E). However, we only find very few *Il9* or *Spi1* (encodes the Th9-  
172 associated transcription factor PU.1) expressing cells in the lung. *Il9* expression was also barely  
173 detectable in the MLN, while *Spi1* was expressed in the MLN4 population (Fig. 2B).

174

175 Cluster L2 and MLN5 visually form a “bridge” between the MLN and lung compartments. Indeed  
176 cells in these clusters both express genes coding for CD62L (*Sell*), CCR7 and S1PR1 involved in  
177 cell adhesion and T cell trafficking suggesting that these clusters contain recent immi-/emigrants  
178 (Fig. 2B). They also express *Tcf7* (associated with self-renewal capacity) and *Cd27* (encoding a  
179 central memory T cell marker). In line, the whole “bridge” shows a circulating memory signature  
180 (Rahimi, Nepal, Cetinbas, Sadreyev, & Luster, 2020) (Fig. 2C). L2 is the only lung fraction that  
181 expresses reasonable amounts of *Cxcr5* and *Tox2*, both of which expressed in a majority of cells  
182 in MLN5 (Fig. 1A, 2B). This suggests that the profile of these lung cells in part reflects the profile  
183 found in secondary lymphoid organs and strengthens their identification as migrating cells.  
184 However, there are also differences between the lung- and MLN-associated “bridge” clusters. Cells  
185 in L2 expressed more CD44, which is suggestive of cells in later central memory or effector cell  
186 state and also shows more expression of the exhaustion marker encoding *Tox2* and *Pdcd1*. In  
187 contrast, MLN5 does not show clear signs of a lung signature (Fig. 2E), potentially reflecting that  
188 the visual “bridge” is not a real connection and contains immi-/emigrants to/from other secondary  
189 lymphatic organs like the lung draining lymph nodes or other peripheral organs.

190 Proliferating cells of both organs have a similar expression profile and fall into the same cluster  
191 (L+MLN) as proliferation induces a strong gene signature highlighted by a proliferation-associated  
192 E2F signature gene set (Fig. 2C).

193 As already noted in the comparison between MLN and lung cells on a broad perspective, L1 lung  
194 cells seem to have a stronger effector phenotype (e.g. stronger expression of *Il1r1* (encodes ST2),  
195 *Cysltr1* (receptor for cysteinyl-leukotrienes C<sub>4</sub>, D<sub>4</sub> and E<sub>4</sub>), *Il2ra*, *Il5*, *Il13*) but MLN4 has a similar  
196 signature. Both populations are high for a published signature of lung resident memory T cells  
197 (Rahimi et al., 2020) (Fig. 2C) and for both the effector-associated genes *Plac8* and *Adam8* drive  
198 the signature (Fig. 2E and not shown). In contrast to L1, most MLN4 resident memory signature  
199 cells express the gene encoding CCR9 relevant for lamina propria homing (Campbell & Butcher,

200 2002; Stenstad et al., 2006), while lung cells express the gene for CCR8 hardly found in the MLN  
201 (not shown). MLN4 and the MLN6 cluster (innate-like/NKT) both express the resident memory  
202 signature and *Ccr9*, probably reflecting local effector/resident memory populations that participate  
203 in the intestinal immune response. Of note, there is also a *Ccr9*-expressing fraction of cells in L1  
204 with little overlap to the *I/I5/I13* secreting cells (Fig. 2B). These cells might come from or might  
205 migrate to the lamina propria. Interestingly, the gene for the exhaustion marker PD-1 is hardly  
206 detectable in the MLN but clearly present in the lung. It can be relevant to rescue differentiating T  
207 cells from apoptosis under inflammatory conditions (Patsoukis et al., 2015). In contrast, another  
208 exhaustion marker-encoding gene, *Tox2* is only marginally expressed in both populations (Fig. 2B).

209 While Th1 and Th2 cells are often seen as counterparts that can antagonize differentiation of  
210 each other, there is also evidence that the Th1 hallmark cytokine IFN- $\gamma$  promotes proper Th2  
211 heterogeneity and differentiation either directly as suggested by *in vitro* differentiation studies  
212 (Wensky, Marcondes, & Lafaille, 2001) or indirectly by inducing activation of DCs with Th2-priming  
213 capacity (Connor et al., 2017; Webb et al., 2017). In accordance MLN3 expresses an IFN response  
214 signature after Nb infection (Fig. 2C) likely associated with Th2 priming and differentiation. We  
215 further identified an unusual subset of Th2 cells (MLN7) which contains genes for the MHCII-  
216 associated invariant chain(CD74), complement component C1q, lysozyme and CD209b. Some of  
217 these genes are rather associated with myeloid cells like DCs or macrophages. This population  
218 might therefore represent cells emulsified with exosomes or RNA containing vesicles during library  
219 generation, either externally attached or taken up by the cell.

220

221

## 222 **RNA-inferred developmental directionality of Th2 cells supports proliferation as a hub for** 223 **differentiation decisions.**

224 To infer developmental relatedness of clusters defined above we performed an RNA velocity  
225 analysis in which the ratio of spliced to unspliced RNA transcripts is used to calculate and visualize  
226 likely developmental directions (Bergen, Lange, Peidli, Wolf, & Theis, 2020; La Manno et al., 2018)  
227 (Fig. 2A). We used the scVelo algorithm (Bergen et al., 2020) which identifies the most  
228 undifferentiated cells as root cells and highly differentiated cells as developmental end-points (Fig.  
229 2D), connected by arrows that show likely paths from root to end-points (Fig. 2A). The proliferation  
230 cluster (L+MLN) reflects the majority of root cells in our data and highlights proliferation, in  
231 accordance with the literature (Gett & Hodgkin, 1998; Gulati et al., 2020; Radtke & Bannard, 2018),  
232 as a critical branching point at which differentiation decisions are taken. The MLN part of the  
233 “bridge” clusters (MLN5), the IFN signature cluster (MLN3) and the main MLN (Basic activated Th2;  
234 MLN1) cluster are marked as relatively diffuse end-points in the MLN, associated with a low  
235 differentiation speed and confidence reported by scVelo (Fig. 2D). This suggests that wide parts of  
236 the MLN Th2 cells are relatively heterogeneous. The effector/resident memory like cluster (MLN4)  
237 is in itself heterogeneous and contains cells with a strong root signature which hardly overlap with  
238 the also contained strong resident memory signature cells. A relatively high differentiation speed  
239 and confidence compared to other MLN clusters suggests that it contains a fast developing  
240 effector/resident memory like population. Based on the MLN5 “bridge” cluster definition as an end-  
241 point, it might rather reflect cells that leave the MLN. The lung cluster of the “bridge” (L2) instead  
242 contains cells that differentiate with high confidence and inferred speed towards the main lung  
243 cluster of effector cells (L1), which suggests that these cells enter the lung and further differentiate

244 locally. The IL-5/IL-13 double producers previously defined as highly differentiated effector cells  
245 (Upadhyaya et al., 2011) reflect the end-point in the lung (Fig. 2A,D).

246 In conclusion, RNA velocity supports proliferation as a hub for differentiation in the Th2  
247 compartment and supports that migratory Th2 cells rather leave secondary lymphatic organs and  
248 enter peripheral organs while the reverse migration path is a rare event.

249

250

### 251 **Clonal relatedness of Th2 cells in distant organs confirms effective exchange of effector** 252 **cells**

253 The single cell immune profiling approach allows for combined RNA expression profiling and TCR  
254 repertoire analysis, which made exploration of clonal relatedness between clusters possible. In line  
255 with previous results (Seidl et al., 2011) we find a broad TCR repertoire after Nb infection as the  
256 majority of distinct TCRs was only found in one cell. However, 28% of cells expressed a TCR found  
257 in at least two different cells (same CDR3 nucleotide sequence, the same variable and joining  
258 segments). The most abundant clone has fifteen sequenced members in the samples analyzed  
259 which translates to about 8600 estimated members in total lung and MLN tissue. As we only  
260 analyze a small sample of the whole organs the calculation clearly underestimates the fraction of  
261 expanded T cell clones in the population. A still substantial part of clones is found in both organs,  
262 which suggests an effective distribution between MLN and lung. In contrast, only two small clones  
263 were identical between the two analyzed mice implicating very few public clones (Fig. 3A). The  
264 innate-like/NKT innate cluster (MLN6) and the MLN7 cluster hardly contained expanded clones  
265 suggesting limited TCR specificity-driven proliferation in these clusters (Fig. 3B). Cells of the  
266 “bridge” clusters (MLN5 and L2) contain substantially more expanded clones but less than the  
267 effector/resident memory likepopulations (MLN4 and L1), which in turn contain less expanded  
268 clones than the more homogeneous majority of MLN clusters (MLN1, MLN2, MLN3). It might reflect  
269 that the “bridge” clusters contain immi-/emigrated cells from distant sites with less clonal overlap  
270 to the local population.

271 Next, we find that strongly expanded clones are effectively spread over organs (Fig. 3C). The  
272 typical caveats of current single cell technologies (sampling noise and limited sample size) do not  
273 allow to draw a similar conclusion for lowly expanded clones (<3 cells per organ). Determination of  
274 the clonal relatedness of clusters compared to the overall frequency of a cluster in the data set  
275 again highlights effective distribution of effector Th2 cells between distant organs (Fig. 3D). The  
276 clones of clusters that are most distant to cells of the other organ (L1, MLN1, MLN2 and MLN3)  
277 tend to expand more locally, represented by the higher percentage of related cells found in the  
278 same organ compared to the overall distribution of clusters. Directly compared to those clusters,  
279 the clones in “bridge” clusters (L2 and MLN5) have a higher frequency of members in the other  
280 organ, especially apparent in the other part of the “bridge” in each case. The effector/resident  
281 memory like cluster of the MLN (MLN4) also shows increased relatedness to the lung that contains  
282 a large number of effector cells in cluster L1. The finding that clusters visualized near the other  
283 organ also show enhanced TCR repertoire relatedness to that organ confirms significant inter-  
284 organ migration and that the UMAP efficiently displays real relatedness of clusters.

285 As a next step, we visualized the five most strongly expanded clones determined for each organ  
286 separately or we combined counts to get the most strongly expanded clones in the total data set  
287 (Fig. 3E). Members of such clones in the MLN tend to be preferentially found in the MLN1 cluster  
288 and to a lower extend in the neighboring Tfh-associated cluster (MLN2) and the IFN signature  
289 cluster (MLN3). They are hardly found in the lung proximal clusters (MLN4-MLN7). However, few  
290 members of four of the top expanded MLN clones are found in the lung and are therefore

291 successfully spread across organs. Top expanded lung clones do not overlap with the top  
292 expanded MLN clones and preferentially show up in the big lung cluster in which effector cells are  
293 found (L1). In contrast to the MLN only one of the top expanded lung clones has members in the  
294 MLN, indicating that these clones successfully expanded locally but have limited capacity to spread  
295 to the MLN. The five most highly expanded clones in the whole data set strongly overlap with the  
296 ones determined for the separate organs. This indicates that despite remarkable exchange  
297 between the distant organs, strong local expanders dominate the response and while more evenly  
298 distributed clones are present, they do not outnumber locally expanded ones in a combined  
299 analysis of MLN and lung cells.

300 In summary, there is substantial overlap of expanded clones between the MLN and lung during  
301 Nb infection, but rather locally restricted clones successfully expanded in an otherwise diverse pool  
302 of Th2 cells.

303

### 304 **No general preference for specific TCR chain compositions.**

305 After analysis of single clones in the last part, where we found expansion but no obvious dominant  
306 clones, we determined if there are preferentially used TCR segments or segment combinations.  
307 First, we included only one representative member per clone and compared if the same  
308 combination of TCR $\alpha$  and TCR $\beta$  chain segments is shared between the top fifty most frequently  
309 used segment combinations in both organs, both analyzed mice and in non-expanded versus  
310 expanded clones (Fig. 4A). For the non-expanded clones there was hardly any overlap seen  
311 between mice or organs, only two of the fifty combinations were found in three of the four analyzed  
312 organs (MLN and lung of two mice). For the expanded clones, there was limited overlap in  
313 combined segment usage between organs of one mouse but not the other. Combinations of TCR $\alpha$ -  
314 or TCR $\beta$ -variable with joining segments and TCR $\alpha$  with TCR $\beta$  variable segments also revealed  
315 limited overlap in the top used combinations. *Trbv1* was a recurrently used TCR $\beta$  variable segment  
316 present in frequently used combinations (Suppl. Fig. 2A). Similarly, for single segments there was  
317 no obvious preferential usage in expanded clones compared to non-expanded ones. Again, *Trbv1*  
318 was one of few constituents that was moderately increased in expanded versus non-expanded  
319 clones (Suppl. Fig. 2B-E). In addition, there was no striking difference observed in total CDR3  
320 amino acid length/length distribution that could be indicative for changes in specificity (Davis et al.,  
321 1998; Rock, Sibbald, Davis, & Chien, 1994) between expanded and non-expanded clones (Suppl.  
322 Fig. 3A). In a finer grained analysis of single TCR $\alpha$  and TCR $\beta$  family members, there was also no  
323 change in CDR3 length or length distribution (Suppl. Fig. 3B,C). The general TCR $\alpha$  or TCR $\beta$  CDR3  
324 length in MLN and lung of the Nb-infected mice is also not altered compared to naive T cells of the  
325 peripheral blood (Fig. 4B).

326 In conclusion, expanded clones in the Th2 effector population show no evidence for preferential  
327 usage of particular TCR $\alpha$  or TCR $\beta$  chains or chain combinations.

328

### 329 **Definition of abundant CDR3 motifs in Th2 cell of Nb-infected mice**

330 T cell antigen-specificity and affinity is mainly confined by variable regions of the TCR and specific  
331 T cells are selected and expanded (Rock et al., 1994). We chose the ten most abundant CDR3  
332 sequences on amino acid level that potentially include motifs relevant for anti-helminth immunity  
333 and highlight their abundance in different organs and mice (Fig. 4C). TCR data of naïve peripheral  
334 blood T cells served as a reference to identify germline-associated CDR3 regions. The most  
335 abundant sequence CVVGDGRGSALGRLHF was found in all samples (Fig. 4C), including the  
336 peripheral blood and represents the CDR3 motif found in the invariant TCR $\alpha$  chain ( $V\alpha 14$ - $J\alpha 18$ ) of  
337 NKT cells (Lantz & Bendelac, 1994). This chain is co-expressed with a variety of different TCR $\beta$

338 chains (not shown) and cells that express such TCRs are primarily found in the innate-like/NKT  
339 cluster (MLN6) (Fig. 2A, C). As this cluster also contains some cells with expression of TCR $\gamma$  chain  
340 segments in addition to functional TCR $\alpha$  and TCR $\beta$  chains we were able to compare if expression  
341 of the invariant TCR $\alpha$  is correlated to TCR $\gamma$  expression. Indeed, on the one hand, 38% of cells that  
342 expressed any TCR $\gamma$  constant or variable chain segment also expressed the invariant TCR $\alpha$  chain  
343 and on the other hand, 62% of cells with the invariant TCR $\alpha$  chain expressed any TCR $\gamma$  constant  
344 or variable chain segment (detection of TCR $\gamma$  and the invariant TCR $\alpha$  chain in the same cell:  
345 correlation 0.48;  $p < 10^{-6}$ ). This might suggest a close relatedness of IL-4 expressing  $\gamma\delta$  T cells with  
346 IL-4 expressing NKT cells in a way that cells unsuccessful or not yet successful to generate a  
347 functional  $\gamma\delta$  TCR preferentially develop into  $\alpha\beta$  NKT cells. Alternatively, NKT cells could induce  
348 low level of TCR $\gamma$  gene expression for other, unknown reasons.

349 Of the remaining 9 most abundant CDR3 motifs of TCR $\alpha$  or TCR $\beta$  chains, seven are not found  
350 in the naïve peripheral blood sample (Fig. 4C), which implies an increased probability for them to  
351 represent specificity for Nb antigens. Furthermore, only one of these motifs (CAIDPSGSWQLIF) is  
352 expressed in both analyzed organs and both mice, which implies that it could be a preferentially  
353 selected motif during Nb infection.

354 We next determined CDR3 motifs that are part of abundant motif combinations (Fig. 4D left  
355 panel). As expected, these overlap with the most expanded clones (Fig. 3E) as cells of an expanded  
356 clone always use the same chain combination. Only one of the five TCR $\alpha$  CDR3 motifs  
357 (CAAEAGTGGYKVVVF) was associated with expansion in more than one clone (two clones with  
358 same TCR $\alpha$  CDR3 motif but different TCR $\beta$  CDR3 motifs). In addition, all five depicted TCR $\alpha$  CDR3  
359 motifs present in abundant pairings are also present in unique pairings with other TCR $\beta$  CDR3  
360 motifs. This implies that these motifs are not restricted to an exact TCR $\alpha$ /TCR $\beta$  combination or a  
361 single clone to be recruited to the Th2 compartment.

362 As others described (He et al., 2002; Padovan et al., 1993; Padovan et al., 1995) we find T cell  
363 clones with expression of two TCR $\alpha$ /TCR $\beta$  chain-encoding genes. At least in highly abundant  
364 combinations it is unlikely that these are technical artifacts due to contamination with RNA from  
365 another cell during library preparation. The clone with the most frequently found combination of  
366 CDR3 motifs (clone MLN1) expresses one TCR $\beta$  and two TCR $\alpha$  chains, both on average with  
367 similar umi counts. Whether both TCR $\alpha$  chains are successfully translated is not known. Of the five  
368 depicted TCR $\alpha$  CDR3 motifs, often present in successful CDR3 combinations, four were found in  
369 some cells that expressed more than two TCR chains but this frequency is in the expected range  
370 for T cells (Alam & Gascoigne, 1998; Balomenos et al., 1995; Davodeau et al., 1995; Dupic,  
371 Marcou, Walczak, & Mora, 2019).

372 In addition to CDR3 motifs found frequently in combinations (expanded clones), we also find  
373 abundant CDR3 motifs combined with various other unique TCR chains. (present in several non-  
374 expanded clones) (Fig. 4D right panel). These could include CDR3 motifs that provide anti-Nb  
375 specificity but failed to induce substantial expansion or accumulation of Th2 cells expressing such  
376 TCRs.

377 In line with a slightly preferential usage of the *Trbv1* gene in expanded compared to non-  
378 expanded Th2 cells we find that three of the expanded TCR $\alpha$  CDR3 motifs (CAIDPSGSWQLIF,  
379 CAIDSSGSWQLIF, CAASDTNTGKLTF) are preferentially co-expressed with *Trbv1*, which suggest  
380 that *Trbv1* is relevant for the immune response against Nb.

381  
382  
383



## 384 Discussion

385

386 Th2 heterogeneity, organ crosstalk and tissue-specific immunity are increasingly appreciated  
387 (Schoettler, Hrusch, Blaine, Sperling, & Ober, 2019; Szabo, Levitin, et al., 2019; Szabo, Miron, &  
388 Farber, 2019). Here, we applied combined transcriptome and TCR clonotype analysis on Th2 cells  
389 across organs upon Nb infection. We identified lung- and MLN-specific gene signatures as well as  
390 subpopulations with shared migration and effector/resident memory profiles between organs. We  
391 find that expression of tissue damage-associated cytokine coding genes *Il13* and *Il5* is restricted to  
392 the effector/resident memory populations in lung and MLN. Interestingly these clusters also contain  
393 transcriptionally similar cells that express *Il10* but widely lack expression of the Treg marker  
394 encoding gene *Foxp3*. Similar cells have been described in the skin at the infection site after  
395 repeated *Schistosoma mansoni* cercaria infection where these cells have immunosuppressive  
396 functions (Sanin, Prendergast, Bourke, & Mountford, 2015). Furthermore, effector/resident memory  
397 like cells in the MLN are not homogeneous and are found in two clusters of which one is an innate-  
398 like/NKT-cluster. Interestingly, the NKT population in this cluster not only co-expresses the invariant  
399 NKT cell-associated invariant TCR $\alpha$  chain (V $\alpha$ 14-J $\alpha$ 18) together with a highly diverse repertoire of  
400 TCR $\beta$  chains but also transcripts for TCR $\gamma$  chains, which implies shared developmental pathways  
401 of NKT and  $\gamma\delta$  T cells that both tend to express restricted receptor repertoires. The cluster also  
402 contains cells that express *Cxcr3*, encoding a typical Th1 marker. CXCR3 has been noted in a  
403 small fraction of Th2 cells (Kim et al., 2001) but was not associated with IL-4 producing NKT or  $\gamma\delta$   
404 T cells before. These findings reveal a heterogeneous effector/resident memory pool in the Th2  
405 population.

406 When we searched for activation signatures, we found a population of cells with an IFN response  
407 signature present in the MLN. Murine *in vitro* studies imply that IFN signaling is needed for proper  
408 Th2 differentiation (Wensky et al., 2001). Therefore, Th2 cells with an IFN response signature  
409 probably reflect cells that undergo priming or differentiation. Our unbiased RNA velocity analysis  
410 further defines them as a differentiation endpoint, suggesting that the IFN response signature is  
411 rather related to terminal differentiation. However, the velocity algorithm tries to start from the most  
412 undifferentiated cells, which are not necessarily the recently activated and recruited early Th2 cells.  
413 Therefore, RNA velocity data needs thoughtful interpretation. However, a fraction of proliferating  
414 cells shows low expression of Th2 signature genes and is likely in a stage where differentiation can  
415 be determined. In addition to potential developmental paths, RNA velocity analysis suggests that  
416 development is faster and has a stricter directionality in the lung compared to the MLN, consistent  
417 with the view that the majority of Th2 cells in MLN are less terminally differentiated.

418 Cells in the migratory clusters of both organs show a weaker organ-specific separation after  
419 dimensional reduction but rather form a “bridge” on the UMAP that suggests effective exchange  
420 between organs. In line, TCR analysis of our Th2 cells revealed effective exchange of expanded  
421 clones between organs. However, the most expanded clones in the one organ were not the most  
422 expanded in the other organ. This might relate to different immunological preferences in different  
423 compartments or to the different larval stages in which Nb is present in lung and MLN,. Of note,  
424 comparison of human bulk TCR repertoires between the lung and its draining lymph node also  
425 showed a higher intra-organ TCR repertoire overlap than between organs. This was interpreted to  
426 mean that the T cells originate from different precursor pools and recognize distinct antigens  
427 (Schoettler et al., 2019). Our data clearly refines that there is effective spread of Th2 effector T  
428 cells from the same pool of cells even across distant organs.

429 Another factor that likely protects from an overshooting Th2 response and could be subject to  
430 modulation by the worm is the expression of TNFR2 as impaired TNFR2 signaling leads to



431 augmented Th2 responses (Li et al., 2017). We observed transcripts for TNFR2 preferentially in  
432 the lung compared to the MLN after Nb infection, which has not yet been described to our  
433 knowledge.

434 In summary, combined transcriptome and TCR clonotype analysis at single cell resolution  
435 provides information about Th2 heterogeneity across organs and reveals relatedness of IL-4  
436 producing NKT cells to  $\gamma\delta$  T cells. RNA-velocity combined with knowledge from published data  
437 appears compatible with a model, in which poorly differentiated proliferating Th2 cells are at a  
438 decision-point in their development, with IFN signaling being involved in diversification and  
439 differentiation of the Th2 compartment. Despite efficient exchange of expanded Th2 clones  
440 between distant organs, the most abundant clones seem to expand locally. Further functional  
441 characterization of expanded TCR clonotypes by generating TCR-transgenic mice will help to  
442 investigate Th2 cell differentiation, plasticity and memory formation in response to a natural  
443 helminth pathogen *in vivo*.

444

445

446

## 447 **Materials and Methods**

448

### 449 **Mice and *Nippostrongylus brasiliensis* Infection**

450 Two IL-4eGFP reporter (4get) mice (Mohrs et al. 2001) at the age of 13 weeks were infected with  
451 Nb. For this, third-stage larvae (L3) were washed in sterile 0.9% saline (37°C) and 500 organisms  
452 were injected subcutaneously (s.c.) into mice ten days before analysis. To avoid bacterial infections  
453 mice received antibiotics-containing drinking water (2 g/l neomycin sulfate, 100 mg/l polymyxin B  
454 sulfate; Sigma-Aldrich, St. Louis, MO) for the first 5 days after infection. Mice were kept under  
455 specific pathogen free conditions and were maintained in the Franz-Penzoldt Center in Erlangen.  
456 All experiments were performed in accordance with German animal protection law and European  
457 Union guidelines 86/809 and were approved by the Federal Government of Lower Franconia.

458

### 459 **Single cell RNA and TCR sequencing**

460 At day 10 after Nb infection lungs and MLNs of IL-4eGFP reporter (4get) mice were harvested.  
461 Lungs were perfused with PBS, cut into small pieces and digested with the commercial “Lung  
462 Dissociation kit” (Miltenyi, Bergisch Gladbach, GER) according to manufacturer’s instructions.  
463 Digested lungs and complete MLNs were gently mashed through a 100  $\mu$ m cell strainer. For lung  
464 cells a 40% percoll purification was applied and erythrocytes were lysed with ACK-buffer (0.15 M  
465 NH<sub>4</sub>Cl, 1 mM KH<sub>2</sub>PO<sub>4</sub>, 0.1 mM Na<sub>2</sub>EDTA). Then samples of both organs were treated with Fc-  
466 receptor blocking antibody (anti-CD16/32, clone 2.4G2, BioXCell, West Lebanon, NH) and  
467 stained with anti-CD4-Percp-Cy5.5 antibody (clone: RM4-5). IL-4eGFP<sup>+</sup>CD4<sup>+</sup> cells were sorted  
468 and for each sample, 5000 cells were subjected to 10x Chromium Single Cell 5’ Solution v2  
469 library preparation using the TCR-specific VDJ library kit according to manufacturer’s instructions  
470 (10xGenomics, Pleasanton, CA). Gene expression libraries were sequenced on an Illumina  
471 HiSeq 2500 sequencer using the recommended read lengths for 10x Chromium 5’ v2 chemistry  
472 to a depth of at least 30000 reads per cell. VDJ libraries were sequenced as paired 150 bp reads  
473 to a depth of at least 30000 reads per cell.

474

### 475 **Computational analysis**

476 We used Cell Ranger (10x Genomics) to demultiplex sequencing reads, convert them to FASTQ  
477 format with mkfastq (Cell Ranger 2.1.1), align them to the murine genome (mm10 v3.0.0) and

478 obtain TCR VDJ clonotypes, consensus sequences, contigs and CDR3 regions (Cell Ranger 3.0.1).  
479 TCR associated genes (VDJ and constant region genes for  $\alpha$ ,  $\beta$ ,  $\gamma$ ,  $\delta$  chains) were excluded but  
480 kept as metadata to avoid clustering by TCR genes. To be included, cells needed to be defined as  
481 such by Cell Ranger and to have > 500 UMIs, > 500 genes detected per cell, < 7% mitochondrial  
482 reads and a novelty >0.8 (log10 of gene number divided by log10 of UMIs). Data normalization,  
483 differential expression analysis, clustering (based on top 2000 highly variable genes) and  
484 dimensional reduction (UMAP based on top 15 principal components) were performed in Seurat  
485 (version 3.1.1) (Stuart et al., 2019) under R (version 3.5.1). Gene set-scores for each cell were  
486 calculated in Seurat as published before (Tirosh et al., 2016). Gene sets were taken or generated  
487 from the published data: resident memory and circulating memory (Rahimi et al., 2020), IL-33  
488 signature (Morimoto et al., 2018), other sets were from the "Molecular Signatures Database"  
489 (Subramanian et al., 2005). TCR info was added as metadata to Seurat for combined clonotype  
490 and RNA-profile analysis. For RNA velocity, sequencing reads were aligned with kallisto/bustools  
491 (version 0.46.2/0.40.0) (Bray, Pimentel, Melsted, & Pachter, 2016; Melsted et al., 2021) to a  
492 genome reference with unspliced and spliced RNA variants included (version GRCm39). Obtained  
493 information was used as input for scVelo (version 0.2.3) (Bergen et al., 2020) under python (version  
494 3.8.5). UMAP information from Seurat was transferred to scVelo for consistency. Usage of TCR  
495 chains and TCR chain-combinations was calculated under R with custom scripts. For TCR/CDR3  
496 analysis, we used the Cell Ranger output and followed a recently developed workflow (according  
497 to the "CellaRepertorium" R package) with minor modifications. Contigs that missed a sanity-check  
498 were excluded (needed to be productive, full length, high confidence, supported by >1 UMI, CDR3  
499 length > 5 amino acids). Similar CDR3 sequences were not combined (not assuming similar  
500 specificity for similar sequences) to maintain higher accuracy. We kept all TCR chains of T cell  
501 clones with two TCR $\alpha$ /TCR $\beta$  chain-encoding genes expressed for the same reason. Data is  
502 available via GEO (GSE181342) and the 10xGenomics TCR reference data set via the  
503 10xGenomics website: PBMCs from C57BL/6 mice (v1, 150 x150), Single Cell Immune Profiling  
504 Dataset by Cell Ranger 3.0.0, 10x Genomics, (2018, November 19).

505

#### 506 **Acknowledgments**

507 We thank Kilian Schober for helpful discussion. This work was supported by the Deutsche  
508 Forschungsgemeinschaft (DFG) with grants RTG1660, FOR2599\_TP4, and CRC1181\_A02 to  
509 D.V.

510

#### 511 **Competing interests**

512 The authors state no conflict of interest.

513

#### 514 **References**

- 515 Alam, S. M., & Gascoigne, N. R. (1998). Posttranslational regulation of TCR Valpha allelic  
516 exclusion during T cell differentiation. *J Immunol*, *160*(8), 3883-3890. Retrieved from  
517 <https://www.ncbi.nlm.nih.gov/pubmed/9558094>  
518 Balomenos, D., Balderas, R. S., Mulvany, K. P., Kaye, J., Kono, D. H., & Theofilopoulos, A. N.  
519 (1995). Incomplete T cell receptor V beta allelic exclusion and dual V beta-expressing  
520 cells. *J Immunol*, *155*(7), 3308-3312. Retrieved from  
521 <https://www.ncbi.nlm.nih.gov/pubmed/7561023>

- 522 Bergen, V., Lange, M., Peidli, S., Wolf, F. A., & Theis, F. J. (2020). Generalizing RNA velocity to  
523 transient cell states through dynamical modeling. *Nat Biotechnol*, *38*(12), 1408-1414.  
524 doi:10.1038/s41587-020-0591-3
- 525 Bray, N. L., Pimentel, H., Melsted, P., & Pachter, L. (2016). Near-optimal probabilistic RNA-seq  
526 quantification. *Nat Biotechnol*, *34*(5), 525-527. doi:10.1038/nbt.3519
- 527 Breitfeld, D., Ohl, L., Kremmer, E., Ellwart, J., Sallusto, F., Lipp, M., & Forster, R. (2000). Follicular  
528 B helper T cells express CXC chemokine receptor 5, localize to B cell follicles, and  
529 support immunoglobulin production. *J Exp Med*, *192*(11), 1545-1552.  
530 doi:10.1084/jem.192.11.1545
- 531 Campbell, D. J., & Butcher, E. C. (2002). Rapid acquisition of tissue-specific homing phenotypes  
532 by CD4(+) T cells activated in cutaneous or mucosal lymphoid tissues. *J Exp Med*, *195*(1),  
533 135-141. doi:10.1084/jem.20011502
- 534 Connor, L. M., Tang, S. C., Cognard, E., Ochiai, S., Hilligan, K. L., Old, S. I., . . . Ronchese, F. (2017).  
535 Th2 responses are primed by skin dendritic cells with distinct transcriptional profiles. *J*  
536 *Exp Med*, *214*(1), 125-142. doi:10.1084/jem.20160470
- 537 Davis, M. M., Boniface, J. J., Reich, Z., Lyons, D., Hampl, J., Arden, B., & Chien, Y. (1998). Ligand  
538 recognition by alpha beta T cell receptors. *Annu Rev Immunol*, *16*, 523-544.  
539 doi:10.1146/annurev.immunol.16.1.523
- 540 Davodeau, F., Peyrat, M. A., Romagne, F., Necker, A., Hallet, M. M., Vie, H., & Bonneville, M.  
541 (1995). Dual T cell receptor beta chain expression on human T lymphocytes. *J Exp Med*,  
542 *181*(4), 1391-1398. doi:10.1084/jem.181.4.1391
- 543 Dupic, T., Marcou, Q., Walczak, A. M., & Mora, T. (2019). Genesis of the alphabeta T-cell  
544 receptor. *PLoS Comput Biol*, *15*(3), e1006874. doi:10.1371/journal.pcbi.1006874
- 545 Gett, A. V., & Hodgkin, P. D. (1998). Cell division regulates the T cell cytokine repertoire,  
546 revealing a mechanism underlying immune class regulation. *Proc Natl Acad Sci U S A*,  
547 *95*(16), 9488-9493. doi:10.1073/pnas.95.16.9488
- 548 Glatman Zaretsky, A., Taylor, J. J., King, I. L., Marshall, F. A., Mohrs, M., & Pearce, E. J. (2009). T  
549 follicular helper cells differentiate from Th2 cells in response to helminth antigens. *J Exp*  
550 *Med*, *206*(5), 991-999. doi:10.1084/jem.20090303
- 551 Gowthaman, U., Chen, J. S., Zhang, B., Flynn, W. F., Lu, Y., Song, W., . . . Eisenbarth, S. C. (2019).  
552 Identification of a T follicular helper cell subset that drives anaphylactic IgE. *Science*,  
553 *365*(6456). doi:10.1126/science.aaw6433
- 554 Gulati, G. S., Sikandar, S. S., Wesche, D. J., Manjunath, A., Bharadwaj, A., Berger, M. J., . . .  
555 Newman, A. M. (2020). Single-cell transcriptional diversity is a hallmark of  
556 developmental potential. *Science*, *367*(6476), 405-411. doi:10.1126/science.aax0249
- 557 Guo, L., Wei, G., Zhu, J., Liao, W., Leonard, W. J., Zhao, K., & Paul, W. (2009). IL-1 family  
558 members and STAT activators induce cytokine production by Th2, Th17, and Th1 cells.  
559 *Proc Natl Acad Sci U S A*, *106*(32), 13463-13468. doi:10.1073/pnas.0906988106
- 560 He, X., Janeway, C. A., Jr., Levine, M., Robinson, E., Preston-Hurlburt, P., Viret, C., & Bottomly, K.  
561 (2002). Dual receptor T cells extend the immune repertoire for foreign antigens. *Nat*  
562 *Immunol*, *3*(2), 127-134. doi:10.1038/ni751
- 563 Healey, D. C. C., Cephus, J. Y., Barone, S. M., Chowdhury, N. U., Dahunsi, D. O., Madden, M. Z., . . .  
564 Rathmell, J. C. (2021). Targeting In Vivo Metabolic Vulnerabilities of Th2 and Th17 Cells  
565 Reduces Airway Inflammation. *J Immunol*, *206*(6), 1127-1139.  
566 doi:10.4049/jimmunol.2001029

- 567 Hung, L. Y., Lewkowich, I. P., Dawson, L. A., Downey, J., Yang, Y., Smith, D. E., & Herbert, D. R.  
568 (2013). IL-33 drives biphasic IL-13 production for noncanonical Type 2 immunity against  
569 hookworms. *Proc Natl Acad Sci U S A*, *110*(1), 282-287. doi:10.1073/pnas.1206587110
- 570 Kim, C. H., Rott, L., Kunkel, E. J., Genovese, M. C., Andrew, D. P., Wu, L., & Butcher, E. C. (2001).  
571 Rules of chemokine receptor association with T cell polarization in vivo. *J Clin Invest*,  
572 *108*(9), 1331-1339. doi:10.1172/JCI13543
- 573 King, I. L., & Mohrs, M. (2009). IL-4-producing CD4+ T cells in reactive lymph nodes during  
574 helminth infection are T follicular helper cells. *J Exp Med*, *206*(5), 1001-1007.  
575 doi:10.1084/jem.20090313
- 576 Kumar, S., Tzimas, M. N., Griswold, D. E., & Young, P. R. (1997). Expression of ST2, an interleukin-  
577 1 receptor homologue, is induced by proinflammatory stimuli. *Biochem Biophys Res*  
578 *Commun*, *235*(3), 474-478. doi:10.1006/bbrc.1997.6810
- 579 La Manno, G., Soldatov, R., Zeisel, A., Braun, E., Hochgerner, H., Petukhov, V., . . . Kharchenko, P.  
580 V. (2018). RNA velocity of single cells. *Nature*, *560*(7719), 494-498. doi:10.1038/s41586-  
581 018-0414-6
- 582 Lantz, O., & Bendelac, A. (1994). An invariant T cell receptor alpha chain is used by a unique  
583 subset of major histocompatibility complex class I-specific CD4+ and CD4-8- T cells in  
584 mice and humans. *J Exp Med*, *180*(3), 1097-1106. doi:10.1084/jem.180.3.1097
- 585 Li, X. M., Chen, X., Gu, W., Guo, Y. J., Cheng, Y., Peng, J., & Guo, X. J. (2017). Impaired TNF/TNFR2  
586 signaling enhances Th2 and Th17 polarization and aggravates allergic airway  
587 inflammation. *Am J Physiol Lung Cell Mol Physiol*, *313*(3), L592-L601.  
588 doi:10.1152/ajplung.00409.2016
- 589 Liang, H. E., Reinhardt, R. L., Bando, J. K., Sullivan, B. M., Ho, I. C., & Locksley, R. M. (2011).  
590 Divergent expression patterns of IL-4 and IL-13 define unique functions in allergic  
591 immunity. *Nat Immunol*, *13*(1), 58-66. doi:10.1038/ni.2182
- 592 Lippert, E., Yowe, D. L., Gonzalo, J. A., Justice, J. P., Webster, J. M., Fedyk, E. R., . . . Druey, K. M.  
593 (2003). Role of regulator of G protein signaling 16 in inflammation-induced T  
594 lymphocyte migration and activation. *J Immunol*, *171*(3), 1542-1555.  
595 doi:10.4049/jimmunol.171.3.1542
- 596 Meisel, C., Bonhagen, K., Lohning, M., Coyle, A. J., Gutierrez-Ramos, J. C., Radbruch, A., &  
597 Kamradt, T. (2001). Regulation and function of T1/ST2 expression on CD4+ T cells:  
598 induction of type 2 cytokine production by T1/ST2 cross-linking. *J Immunol*, *166*(5),  
599 3143-3150. doi:10.4049/jimmunol.166.5.3143
- 600 Melsted, P., Boeshaghi, A. S., Liu, L., Gao, F., Lu, L., Min, K. H. J., . . . Pachter, L. (2021). Modular,  
601 efficient and constant-memory single-cell RNA-seq preprocessing. *Nat Biotechnol*.  
602 doi:10.1038/s41587-021-00870-2
- 603 Mohrs, K., Wakil, A. E., Killeen, N., Locksley, R. M., & Mohrs, M. (2005). A two-step process for  
604 cytokine production revealed by IL-4 dual-reporter mice. *Immunity*, *23*(4), 419-429.  
605 doi:10.1016/j.immuni.2005.09.006
- 606 Mohrs, M., Shinkai, K., Mohrs, K., & Locksley, R. M. (2001). Analysis of type 2 immunity in vivo  
607 with a bicistronic IL-4 reporter. *Immunity*, *15*(2), 303-311. doi:10.1016/s1074-  
608 7613(01)00186-8
- 609 Morimoto, Y., Hirahara, K., Kiuchi, M., Wada, T., Ichikawa, T., Kanno, T., . . . Nakayama, T. (2018).  
610 Amphiregulin-Producing Pathogenic Memory T Helper 2 Cells Instruct Eosinophils to  
611 Secrete Osteopontin and Facilitate Airway Fibrosis. *Immunity*, *49*(1), 134-150 e136.  
612 doi:10.1016/j.immuni.2018.04.023

- 613 Na, B. R., Kim, H. R., Piragyte, I., Oh, H. M., Kwon, M. S., Akber, U., . . . Jun, C. D. (2015). TAGLN2  
614 regulates T cell activation by stabilizing the actin cytoskeleton at the immunological  
615 synapse. *J Cell Biol*, 209(1), 143-162. doi:10.1083/jcb.201407130
- 616 Naus, S., Blanchet, M. R., Gossens, K., Zaph, C., Bartsch, J. W., McNagny, K. M., & Ziltener, H. J.  
617 (2010). The metalloprotease-disintegrin ADAM8 is essential for the development of  
618 experimental asthma. *Am J Respir Crit Care Med*, 181(12), 1318-1328.  
619 doi:10.1164/rccm.200909-1396OC
- 620 Padovan, E., Casorati, G., Dellabona, P., Meyer, S., Brockhaus, M., & Lanzavecchia, A. (1993).  
621 Expression of two T cell receptor alpha chains: dual receptor T cells. *Science*, 262(5132),  
622 422-424. doi:10.1126/science.8211163
- 623 Padovan, E., Giachino, C., Cella, M., Valitutti, S., Acuto, O., & Lanzavecchia, A. (1995). Normal T  
624 lymphocytes can express two different T cell receptor beta chains: implications for the  
625 mechanism of allelic exclusion. *J Exp Med*, 181(4), 1587-1591.  
626 doi:10.1084/jem.181.4.1587
- 627 Panzer, M., Sitte, S., Wirth, S., Drexler, I., Sparwasser, T., & Voehringer, D. (2012). Rapid in vivo  
628 conversion of effector T cells into Th2 cells during helminth infection. *J Immunol*, 188(2),  
629 615-623. doi:10.4049/jimmunol.1101164
- 630 Patsoukis, N., Bardhan, K., Chatterjee, P., Sari, D., Liu, B., Bell, L. N., . . . Boussiotis, V. A. (2015).  
631 PD-1 alters T-cell metabolic reprogramming by inhibiting glycolysis and promoting  
632 lipolysis and fatty acid oxidation. *Nat Commun*, 6, 6692. doi:10.1038/ncomms7692
- 633 Peine, M., Rausch, S., Helmstetter, C., Frohlich, A., Hegazy, A. N., Kuhl, A. A., . . . Lohning, M.  
634 (2013). Stable T-bet(+)GATA-3(+) Th1/Th2 hybrid cells arise in vivo, can develop directly  
635 from naive precursors, and limit immunopathologic inflammation. *PLoS Biol*, 11(8),  
636 e1001633. doi:10.1371/journal.pbio.1001633
- 637 Radtke, D., & Bannard, O. (2018). Expression of the Plasma Cell Transcriptional Regulator Blimp-  
638 1 by Dark Zone Germinal Center B Cells During Periods of Proliferation. *Front Immunol*,  
639 9, 3106. doi:10.3389/fimmu.2018.03106
- 640 Rahimi, R. A., Nepal, K., Cetinbas, M., Sadreyev, R. I., & Luster, A. D. (2020). Distinct functions of  
641 tissue-resident and circulating memory Th2 cells in allergic airway disease. *J Exp Med*,  
642 217(9). doi:10.1084/jem.20190865
- 643 Reinhardt, R. L., Liang, H. E., & Locksley, R. M. (2009). Cytokine-secreting follicular T cells shape  
644 the antibody repertoire. *Nat Immunol*, 10(4), 385-393. doi:10.1038/ni.1715
- 645 Rock, E. P., Sibbald, P. R., Davis, M. M., & Chien, Y. H. (1994). CDR3 length in antigen-specific  
646 immune receptors. *J Exp Med*, 179(1), 323-328. doi:10.1084/jem.179.1.323
- 647 Rothenberg, M. E., & Hogan, S. P. (2006). The eosinophil. *Annu Rev Immunol*, 24, 147-174.  
648 doi:10.1146/annurev.immunol.24.021605.090720
- 649 Sanin, D. E., Prendergast, C. T., Bourke, C. D., & Mountford, A. P. (2015). Helminth Infection and  
650 Commensal Microbiota Drive Early IL-10 Production in the Skin by CD4+ T Cells That Are  
651 Functionally Suppressive. *PLoS Pathog*, 11(5), e1004841.  
652 doi:10.1371/journal.ppat.1004841
- 653 Savage, A. K., Constantinides, M. G., Han, J., Picard, D., Martin, E., Li, B., . . . Bendelac, A. (2008).  
654 The transcription factor PLZF directs the effector program of the NKT cell lineage.  
655 *Immunity*, 29(3), 391-403. doi:10.1016/j.immuni.2008.07.011
- 656 Schaerli, P., Willimann, K., Lang, A. B., Lipp, M., Loetscher, P., & Moser, B. (2000). CXC  
657 chemokine receptor 5 expression defines follicular homing T cells with B cell helper  
658 function. *J Exp Med*, 192(11), 1553-1562. doi:10.1084/jem.192.11.1553



- 659 Schoettler, N., Hrusch, C. L., Blaine, K. M., Sperling, A. I., & Ober, C. (2019). Transcriptional  
660 programming and T cell receptor repertoires distinguish human lung and lymph node  
661 memory T cells. *Commun Biol*, 2, 411. doi:10.1038/s42003-019-0657-2
- 662 Seidl, A., Panzer, M., & Voehringer, D. (2011). Protective immunity against the gastrointestinal  
663 nematode *Nippostrongylus brasiliensis* requires a broad T-cell receptor repertoire.  
664 *Immunology*, 134(2), 214-223. doi:10.1111/j.1365-2567.2011.03480.x
- 665 Stark, J. M., Tibbitt, C. A., & Coquet, J. M. (2019). The Metabolic Requirements of Th2 Cell  
666 Differentiation. *Front Immunol*, 10, 2318. doi:10.3389/fimmu.2019.02318
- 667 Stenstad, H., Ericsson, A., Johansson-Lindbom, B., Svensson, M., Marsal, J., Mack, M., . . . Agace,  
668 W. W. (2006). Gut-associated lymphoid tissue-primed CD4+ T cells display CCR9-  
669 dependent and -independent homing to the small intestine. *Blood*, 107(9), 3447-3454.  
670 doi:10.1182/blood-2005-07-2860
- 671 Stuart, T., Butler, A., Hoffman, P., Hafemeister, C., Papalexi, E., Mauck, W. M., 3rd, . . . Satija, R.  
672 (2019). Comprehensive Integration of Single-Cell Data. *Cell*, 177(7), 1888-1902 e1821.  
673 doi:10.1016/j.cell.2019.05.031
- 674 Subramanian, A., Tamayo, P., Mootha, V. K., Mukherjee, S., Ebert, B. L., Gillette, M. A., . . .  
675 Mesirov, J. P. (2005). Gene set enrichment analysis: a knowledge-based approach for  
676 interpreting genome-wide expression profiles. *Proc Natl Acad Sci U S A*, 102(43), 15545-  
677 15550. doi:10.1073/pnas.0506580102
- 678 Szabo, P. A., Levitin, H. M., Miron, M., Snyder, M. E., Senda, T., Yuan, J., . . . Sims, P. A. (2019).  
679 Single-cell transcriptomics of human T cells reveals tissue and activation signatures in  
680 health and disease. *Nat Commun*, 10(1), 4706. doi:10.1038/s41467-019-12464-3
- 681 Szabo, P. A., Miron, M., & Farber, D. L. (2019). Location, location, location: Tissue resident  
682 memory T cells in mice and humans. *Sci Immunol*, 4(34).  
683 doi:10.1126/sciimmunol.aas9673
- 684 Takatsu, K., Kouro, T., & Nagai, Y. (2009). Interleukin 5 in the link between the innate and  
685 acquired immune response. *Adv Immunol*, 101, 191-236. doi:10.1016/S0065-  
686 2776(08)01006-7
- 687 Tibbitt, C. A., Stark, J. M., Martens, L., Ma, J., Mold, J. E., Deswarte, K., . . . Coquet, J. M. (2019).  
688 Single-Cell RNA Sequencing of the T Helper Cell Response to House Dust Mites Defines a  
689 Distinct Gene Expression Signature in Airway Th2 Cells. *Immunity*, 51(1), 169-184 e165.  
690 doi:10.1016/j.immuni.2019.05.014
- 691 Tirosh, I., Izar, B., Prakadan, S. M., Wadsworth, M. H., 2nd, Treacy, D., Trombetta, J. J., . . .  
692 Garraway, L. A. (2016). Dissecting the multicellular ecosystem of metastatic melanoma  
693 by single-cell RNA-seq. *Science*, 352(6282), 189-196. doi:10.1126/science.aad0501
- 694 Tortola, L., Jacobs, A., Pohlmeier, L., Obermair, F. J., Ampenberger, F., Bodenmiller, B., & Kopf,  
695 M. (2020). High-Dimensional T Helper Cell Profiling Reveals a Broad Diversity of Stably  
696 Committed Effector States and Uncovers Interlineage Relationships. *Immunity*, 53(3),  
697 597-613 e596. doi:10.1016/j.immuni.2020.07.001
- 698 Trinh, H. K. T., Nguyen, T. V. T., Choi, Y., Park, H. S., & Shin, Y. S. (2019). The synergistic effects of  
699 clopidogrel with montelukast may be beneficial for asthma treatment. *J Cell Mol Med*,  
700 23(5), 3441-3450. doi:10.1111/jcmm.14239
- 701 Turqueti-Neves, A., Otte, M., Prazeres da Costa, O., Hopken, U. E., Lipp, M., Buch, T., &  
702 Voehringer, D. (2014). B-cell-intrinsic STAT6 signaling controls germinal center  
703 formation. *Eur J Immunol*, 44(7), 2130-2138. doi:10.1002/eji.201344203



- 704 Upadhyaya, B., Yin, Y., Hill, B. J., Douek, D. C., & Prussin, C. (2011). Hierarchical IL-5 expression  
705 defines a subpopulation of highly differentiated human Th2 cells. *J Immunol*, *187*(6),  
706 3111-3120. doi:10.4049/jimmunol.1101283
- 707 Urban, J. F., Jr., Madden, K. B., Svetic, A., Cheever, A., Trotta, P. P., Gause, W. C., . . . Finkelman,  
708 F. D. (1992). The importance of Th2 cytokines in protective immunity to nematodes.  
709 *Immunol Rev*, *127*, 205-220. doi:10.1111/j.1600-065x.1992.tb01415.x
- 710 Veldhoen, M., Uyttenhove, C., van Snick, J., Helmbj, H., Westendorf, A., Buer, J., . . . Stockinger,  
711 B. (2008). Transforming growth factor-beta 'reprograms' the differentiation of T helper 2  
712 cells and promotes an interleukin 9-producing subset. *Nat Immunol*, *9*(12), 1341-1346.  
713 doi:10.1038/ni.1659
- 714 Walker, J. A., & McKenzie, A. N. J. (2018). TH2 cell development and function. *Nat Rev Immunol*,  
715 *18*(2), 121-133. doi:10.1038/nri.2017.118
- 716 Webb, L. M., Lundie, R. J., Borger, J. G., Brown, S. L., Connor, L. M., Cartwright, A. N., . . .  
717 MacDonald, A. S. (2017). Type I interferon is required for T helper (Th) 2 induction by  
718 dendritic cells. *EMBO J*, *36*(16), 2404-2418. doi:10.15252/embj.201695345
- 719 Wensky, A., Marcondes, M. C., & Lafaille, J. J. (2001). The role of IFN-gamma in the production of  
720 Th2 subpopulations: implications for variable Th2-mediated pathologies in  
721 autoimmunity. *J Immunol*, *167*(6), 3074-3081. doi:10.4049/jimmunol.167.6.3074
- 722 Zaiss, D. M. W., Gause, W. C., Osborne, L. C., & Artis, D. (2015). Emerging functions of  
723 amphiregulin in orchestrating immunity, inflammation, and tissue repair. *Immunity*,  
724 *42*(2), 216-226. doi:10.1016/j.immuni.2015.01.020

## 725 **Figures legends**

726

727 **Figure 1. Th2 cells of MLN and lung adopt tissue-specific RNA signatures.** A) General  
728 experimental outline. MLN and lung cells of two individual Nb-infected IL-4eGFP reporter mice  
729 (4get B6) were sorted for IL-4eGFP<sup>+</sup>CD4<sup>+</sup> cells ten days post infection. Then combined  
730 transcriptome and TCR repertoire sequencing was performed. Flow cytometry plots show the  
731 frequency of Th2 cells (IL-4eGFP<sup>+</sup>CD4<sup>+</sup> cells) in MLN and lung. B) UMAP representation of MLN  
732 and lung cells ten days post Nb infection. C) Heatmap of top twenty-five most up- and most  
733 down-regulated genes between MLN and lung cells. D) Expression of selected genes or E) gene-  
734 signature module scores for single cells on top of UMAP representation.

735

736 **Figure 2. Conserved expression profiles for migratory and effector Th2 populations**  
737 **between organs and their inferred developmental paths.** A) *De novo* clustering approach with  
738 manually added cell type description. Arrows present developmental paths inferred by RNA-  
739 velocity. B) Expression of cell lineage-associated and additional marker genes or C) gene  
740 signature scores for single cells on top of UMAPs. D) RNA-velocity defined root cells and  
741 developmental end points as well as inferred differentiation speed (velocity length) and velocity  
742 confidence for cells are visualized on UMAPs. F) Heatmap of top ten upregulated genes for each  
743 cluster compared to all other cells.

744

745 **Figure 3. Clonal relatedness of Th2 cells in MLN and lung.** A) UMAP of MLN and lung cells  
746 split by cells with unique TCRs (non-expanded), cells with the same TCRs found in more than  
747 one cell (expanded), cells with the same TCRs found in both organs and cells with the same  
748 TCRs found in both mice. Cells are colored by cluster. Schematic drawing roughly highlights how  
749 MLN and lung cells are separated on UMAP. B) Stacked bar plot on presence of expanded

750 clones per cluster. Expansion level relates to overall presence in the data set. C) Fraction of cells  
751 in MLN, lung and both organs in relation to clone expansion. Numbers above indicate proportion  
752 of expanded cells in total population. D) Clonal relatedness between clusters. The stacked bar to  
753 the left gives the fraction of each cluster in the data set as a reference (proliferating cluster was  
754 excluded). Stacked bar graphs to the right visualize for every expanded clone of a cluster where  
755 other members of a clone are found (cluster distribution). Numbers above bars represent the  
756 number of cells that each bar represents. Bars for clusters with only few expanded clones are not  
757 shown. Black horizontal lines separate the MLN and lung clusters in the bar graphs. Cluster of  
758 cells with a migratory signature are highlighted as “bridge cluster”. E) Top five expanded clones  
759 by occurrence in MLN (left), lung (center), or in total data set (right).

760

761 **Figure 4. Expanded CDR3 motifs in Th2 cells of Nb-infected mice.** TCR repertoire analysis of  
762 MLN and lung Th2 cells at day ten post Nb infection. A) Clonotype analysis for overlap of the  
763 hundred most commonly used TCR segment combinations (V, J and C region for TCR $\alpha$ ; V, D, J  
764 and C region for TCR $\beta$ ) between clonotypes of different mice and organs. Analysis is performed  
765 separately for non-expanded and expanded clones. B) Amino acid sequence length of TCR $\alpha$  and  
766 TCR $\beta$  CDR3 regions. We compare CDR3 regions from peripheral blood T cells of naïve wild-type  
767 C57BL/6 mice (naïve) with CDR3 regions of Th2 cells from MLN and lung of Nb-infected mice. C)  
768 Most abundant CDR3 amino acid sequences in cells of data set presented as percent of each  
769 sample. D) Co-expression of TCR $\alpha$ -related CDR3 motifs (x-axis) with indicated CDR3 motifs of  
770 TCR $\beta$  or a second TCR $\alpha$  chain in highly expanded clones (left), or highly expanded TCR $\alpha$ \_CDR3  
771 sequences in combination with various TCR $\beta$  or TCR $\alpha$  chains (right). At the bottom, cells that  
772 express the corresponding CDR3 sequences on the x-axis are highlighted on top of UMAP  
773 representation of the data set. We also indicate if a CDR3 sequence is associated with the top  
774 expanded clones (Fig. 3 E).

775

Figure 1

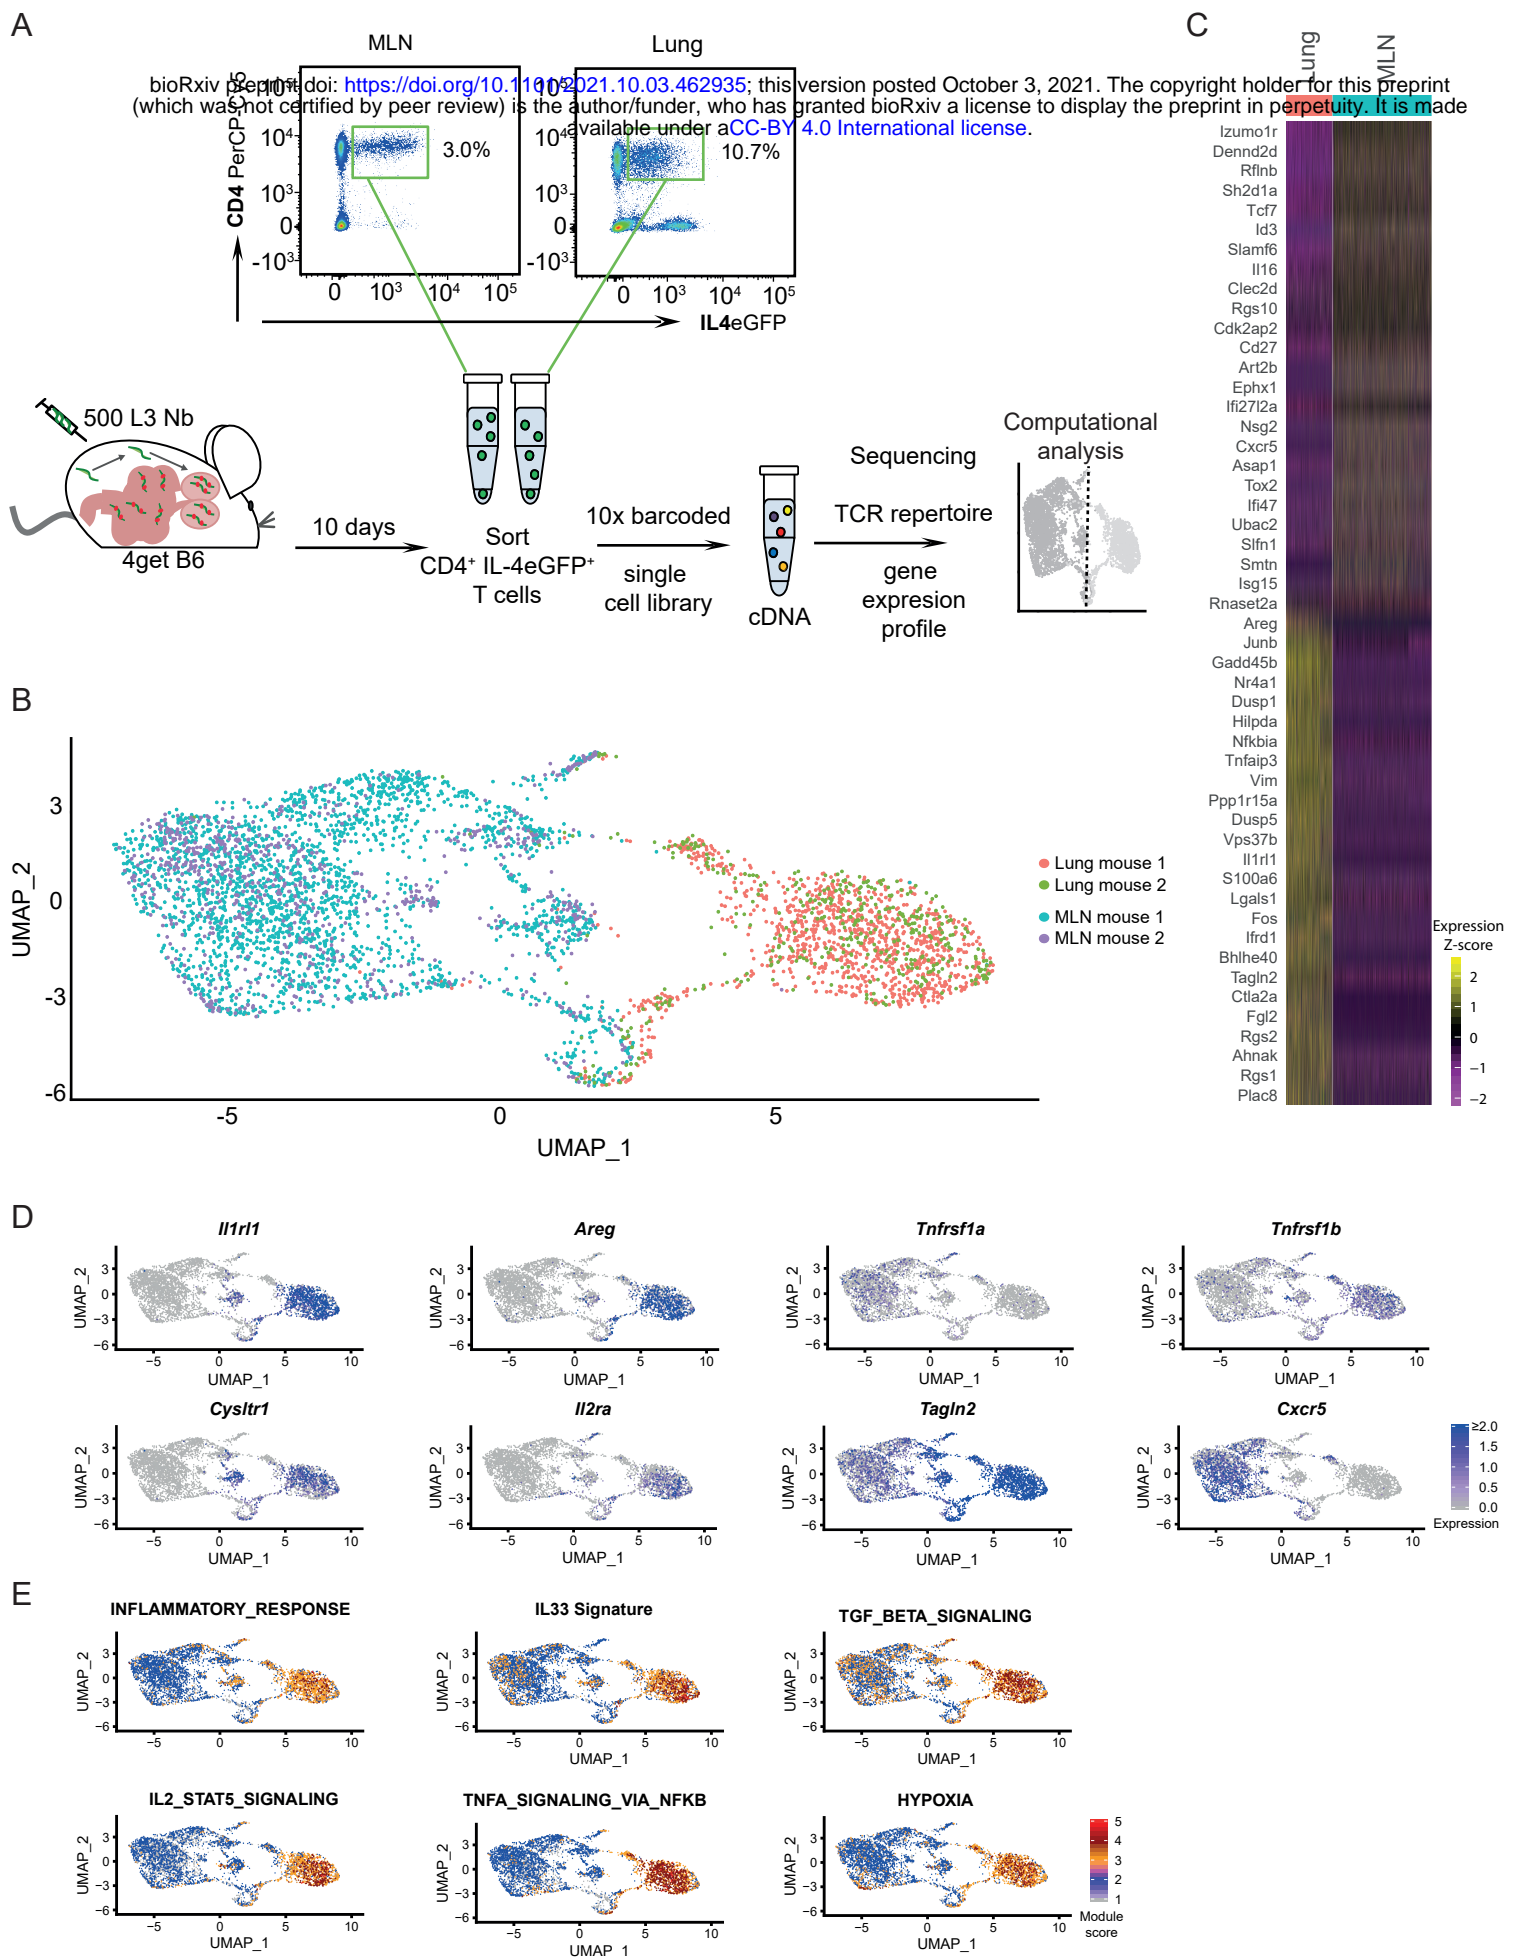



Figure 2

A

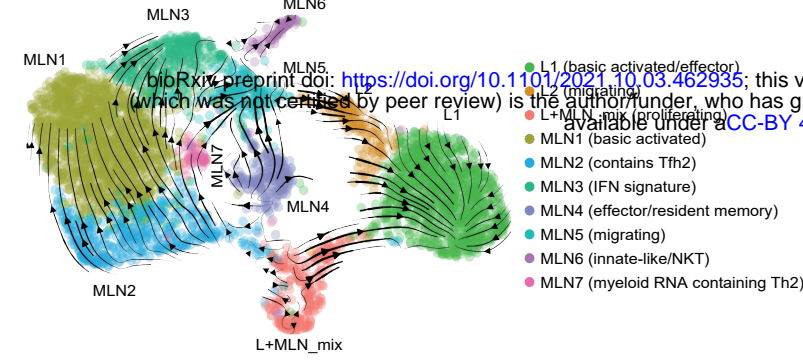

B

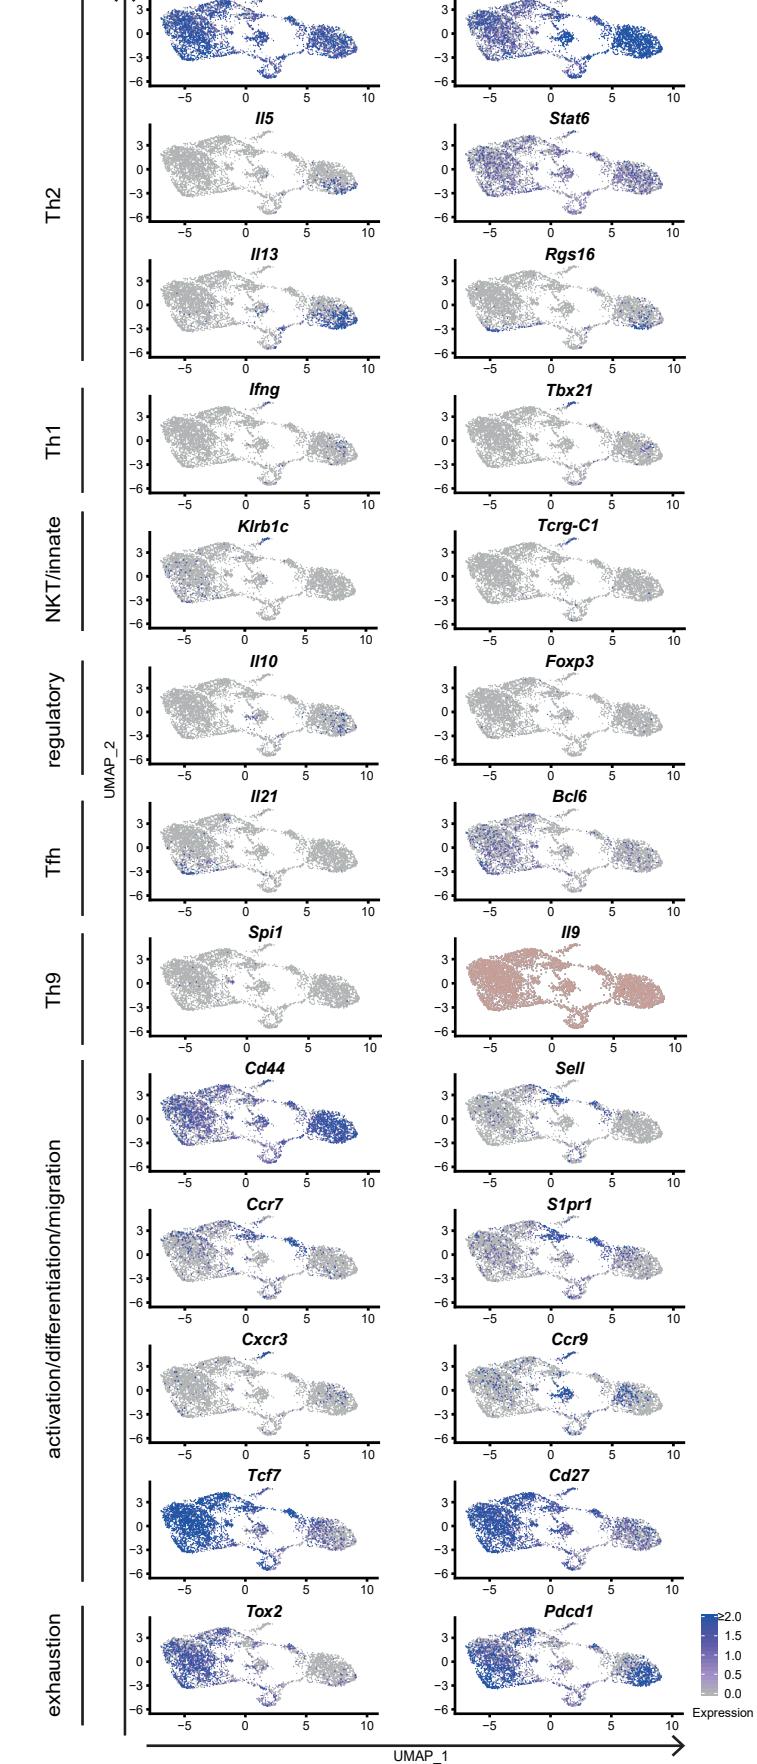

C

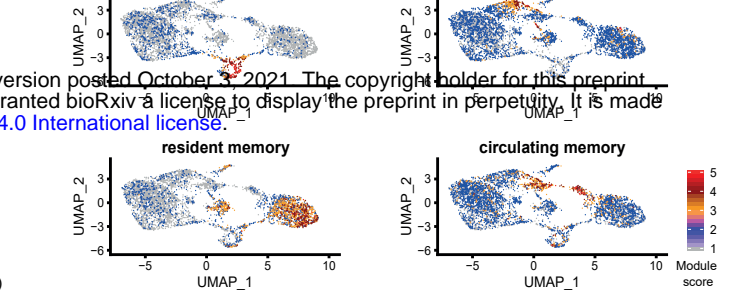

D

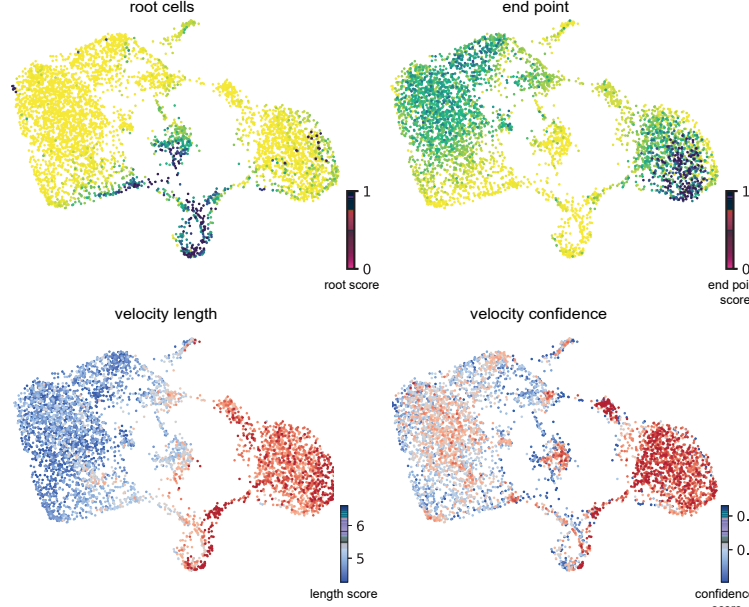

E

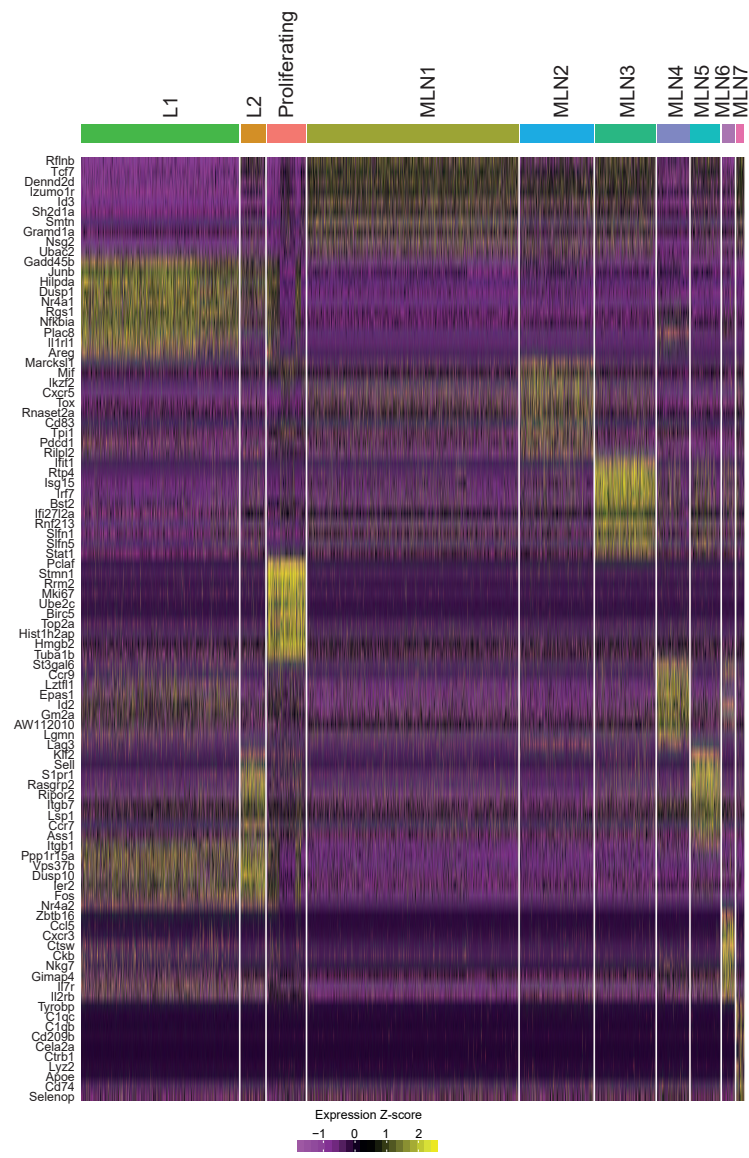

Figure 3

bioRxiv preprint doi: <https://doi.org/10.1101/2021.10.03.462935>; this version posted October 3, 2021. The copyright holder for this preprint (which was not certified by peer review) is the author/funder, who has granted bioRxiv a license to display the preprint in perpetuity. It is made available under aCC-BY 4.0 International license.

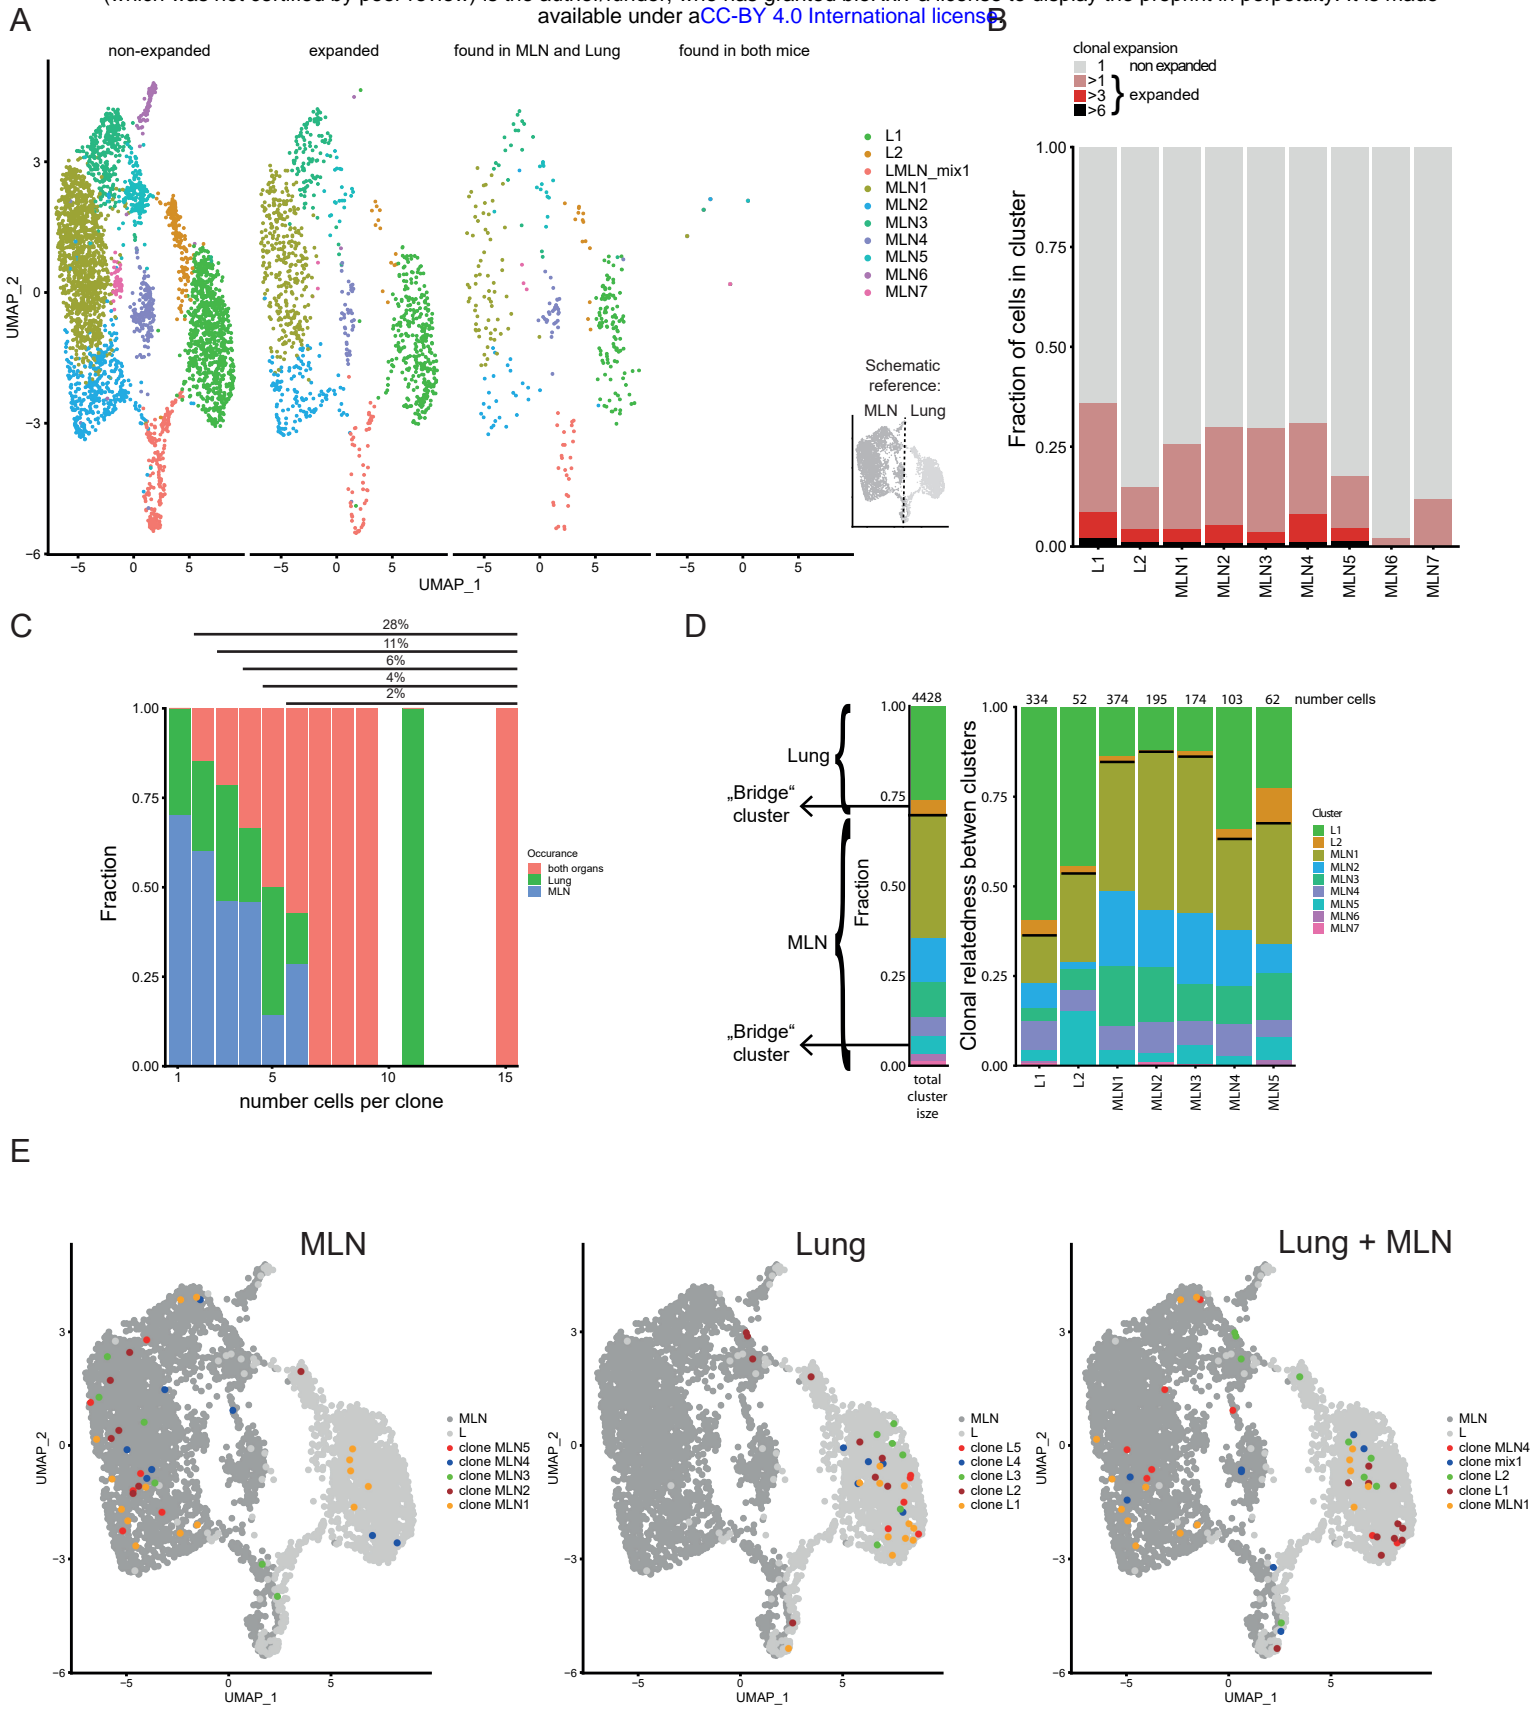

Figure 4

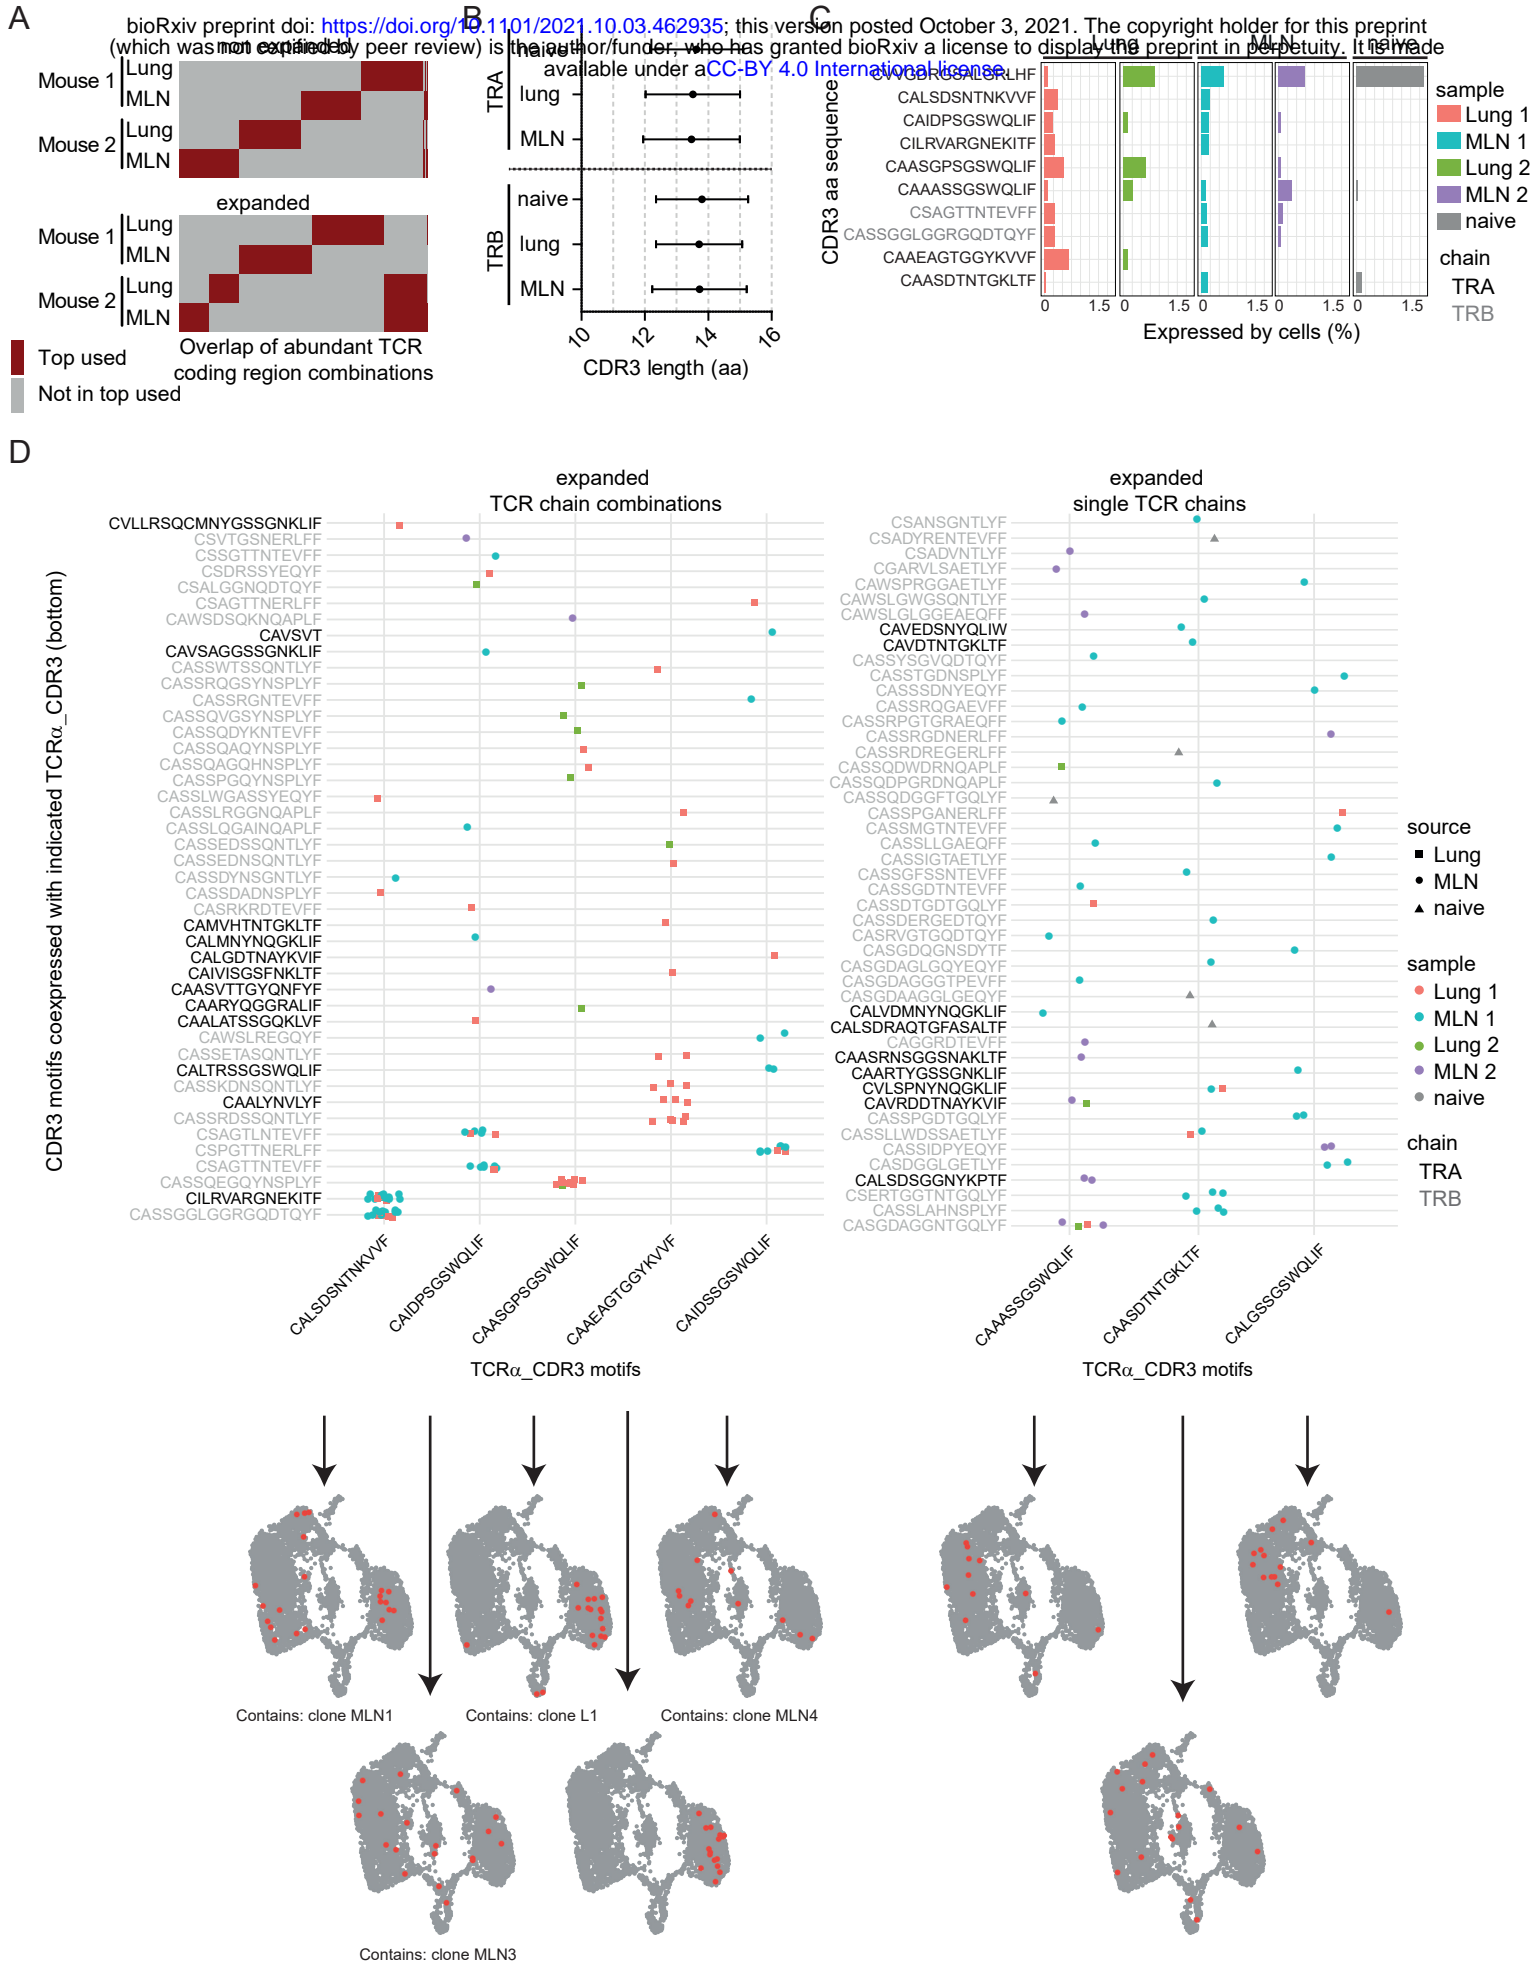



## Supplementary Information for

### Th2 single-cell heterogeneity and clonal interorgan distribution in helminth-infected mice

Daniel Radtke<sup>1\*</sup>, Natalie Thuma<sup>1</sup>, Philipp Kirchner<sup>2</sup>, Arif B Ekici<sup>2</sup>, David Voehringer<sup>1\*</sup>

<sup>1</sup>Department of Infection Biology, Universitätsklinikum Erlangen and Friedrich-Alexander University Erlangen-Nürnberg (FAU), 91054 Erlangen, Germany

<sup>2</sup>Institute of Human Genetics, Universitätsklinikum Erlangen and Friedrich-Alexander University Erlangen-Nürnberg (FAU), 91054 Erlangen, Germany

\*corresponding authors

**Email:** Daniel.Radtke@uk-erlangen.de, david.voehringer@uk-erlangen.de

#### **This PDF file includes:**

Supplementary Figures 1-3

Suppl. Fig. 1

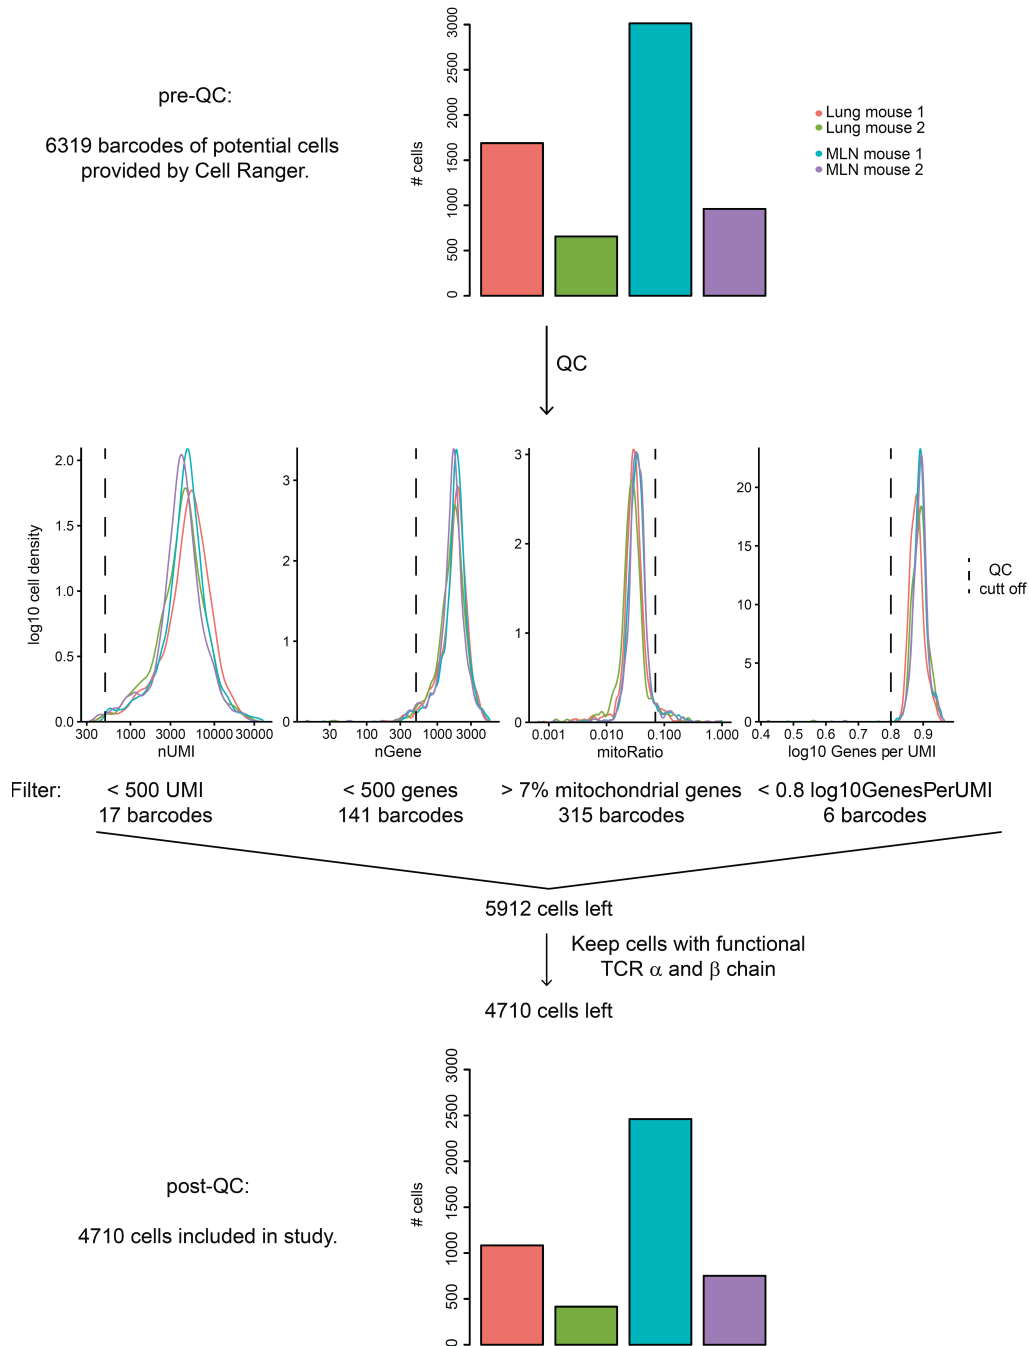

**Suppl. Figure 1. Quality control of Th2 single cell sequencing ten days post Nb infection.** Overview of QC workflow. Numbers of potential cells pre-QC are given for different mice and organs (upper panel). Histograms visualize exclusion of potential cells by various cut offs (middle). Numbers of included cells post QC are visualized for different mice and organs (lower panel). Functional TCR chains according to Cell Ranger definition.

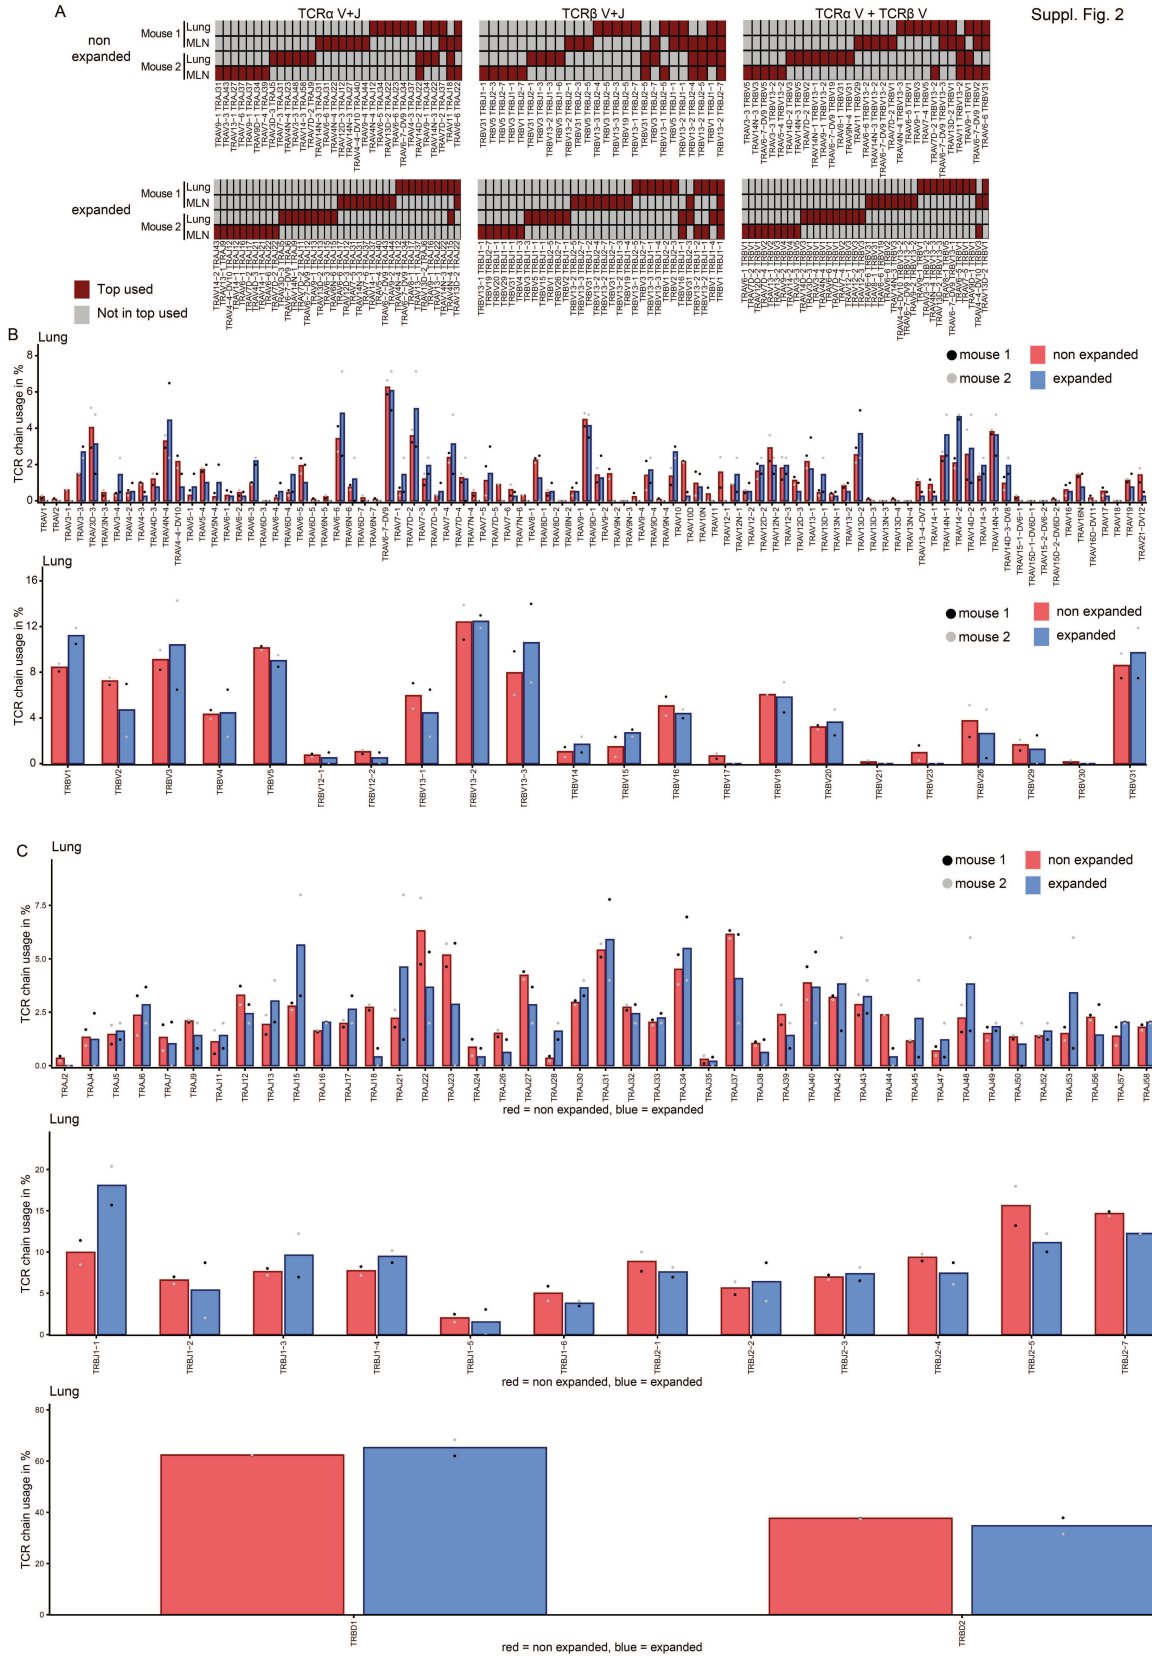

Suppl. Fig. 2

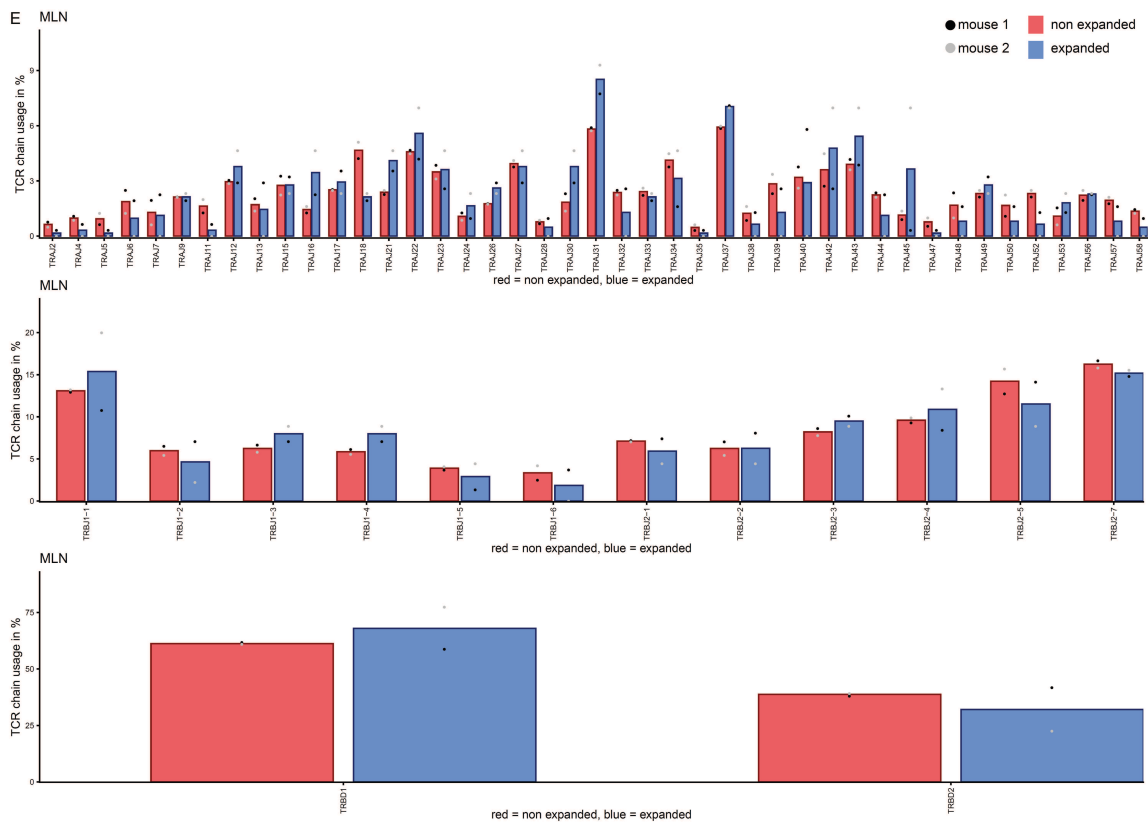

**Suppl. Figure 2. TCR repertoire analysis of MLN and lung Th2 cells at day ten post Nb infection.** A) Overlap of functional TCRs that use the same combination of TCR $\alpha$  V+J segments (left), TCR $\beta$  V+J segments (center), or TCR $\alpha$  V + TCR $\beta$  V segments (right) among the ten top used combinations for each sample. This was determined separately for expanded and non-expanded clones. One cell of each clone was considered to avoid expansion bias. Changes in variable regions were not further taken into account for overlap determination. B) Usage of different TCR $\alpha$  variable or TCR $\beta$  variable segments in lung Th2 cells. C) Usage of different TCR $\alpha$  joining, TCR $\beta$  joining and diversity segments in lung Th2 cells. D) and E) as B) and C) but for MLN.

Suppl. Fig. 3

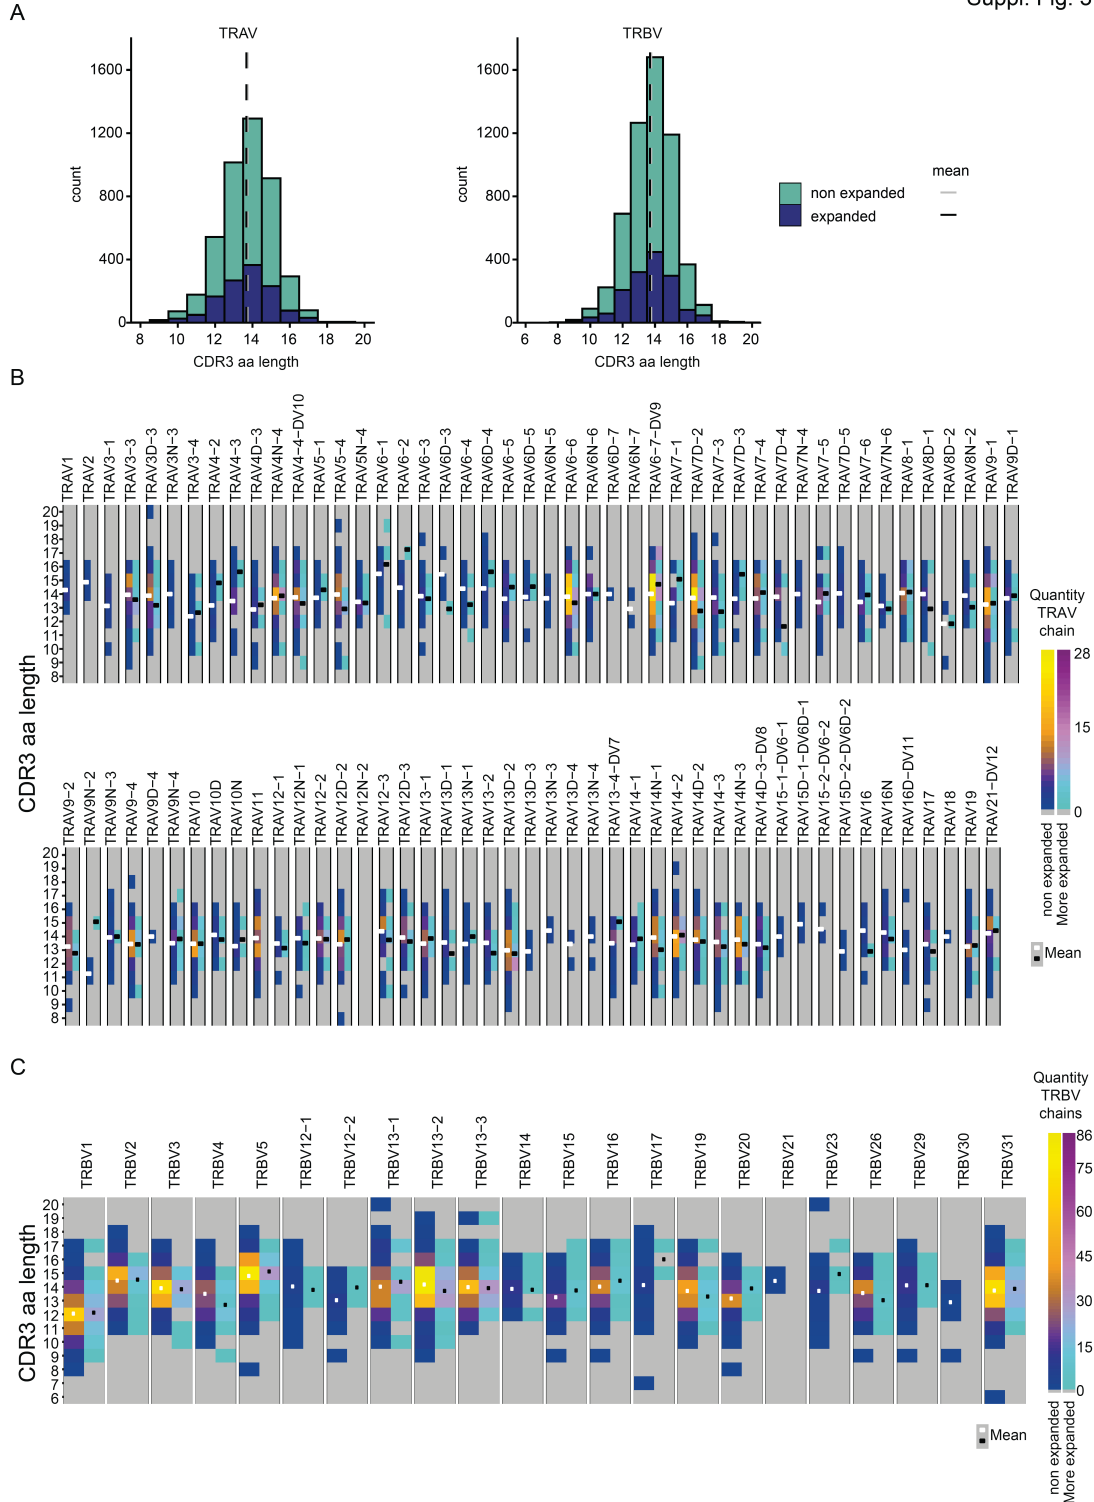

**Suppl. Figure 3. CDR3 length of Th2 TCR $\alpha$  and TCR $\beta$  chains ten days post Nb infection.** A) TCR $\alpha$  and TCR $\beta$  CDR3 amino acid length. Data of MLN and lung cells were combined. CDR3 length was determined separately for expanded and non-expanded clones. One cell of each clone was considered to avoid expansion bias. B) CDR3 amino acid length distribution for all used TCR $\alpha$  variable segments or C) all used TCR $\beta$  variable segments.
